1           **TRANSCRIPTOMIC SIGNATURES OF TELOMERASE-DEPENDENT AND -INDEPENDENT**  
2                                           **AGEING, IN THE ZEBRAFISH GUT AND BRAIN**

3                                           *Running title: Kinetics of ageing in the zebrafish gut and brain*

4  
5           **AUTHORS**

6           Raquel R. Martins<sup>1</sup>, Michael Rera<sup>2</sup> and Catarina M. Henriques<sup>1</sup>

7           Affiliations :

8           1.           The Bateson Centre, Healthy Lifespan Institute and Department of Oncology  
9           and Metabolism, University of Sheffield Medical School, Sheffield, UK.

10          2. Université de Paris / Inserm- Centre de Recherche Interdisciplinaire (CRI Paris)

11  
12          Corresponding author: [c.m.henriques@sheffield.ac.uk](mailto:c.m.henriques@sheffield.ac.uk)

13  
14          **SUMMARY**

15          Telomerase is best known for its role in the maintenance of telomere length and its  
16          implications for ageing and cancer. The mechanisms, kinetics and tissue-specificity  
17          underlying the protective or deleterious mechanisms of telomerase, however, remain  
18          largely unknown. Here, we sought to determine the telomerase-dependent and -  
19          independent transcriptomic changes with ageing, in the gut and brain, as examples of high  
20          and low proliferative tissues, respectively. We hypothesised this could shed light on  
21          common telomerase-dependent and -independent therapeutic targets aimed at preventing  
22          or ameliorating age-associated dysfunction in both tissues. For this, we used the zebrafish  
23          model which, similarly to humans, depends on telomerase for health- and lifespan. We  
24          performed whole tissue RNA sequencing of gut and brain, in naturally aged zebrafish  
25          alongside prematurely aged telomerase null mutants (*tert*<sup>-/-</sup>), throughout their lifespan. Our  
26          study highlights stem cell exhaustion as the first main hallmark of ageing to be de-regulated  
27          in WT zebrafish gut and brain. Towards the end of life, altered intercellular communication  
28          becomes the main hallmark of ageing de-regulated in both gut and brain, and this is  
29          accelerated in both tissues, in the absence of telomerase. Finally, we identify 7 key gene  
30          changes common between the gut and brain at the early stages of ageing, highlighting

31 potential early intervention therapeutic targets for preventing age-associated dysfunction in  
32 both tissues.

33 **KEYWORDS:** Ageing, telomerase, telomeres, gut, brain, zebrafish, transcriptomics,  
34 RNA sequencing

## 35 **1 INTRODUCTION**

36 Ageing is the strongest risk factor for chronic diseases. How and why this is the case  
37 remain important questions in the field, especially as key research has shown that targeting  
38 common hallmarks of ageing, such as cellular senescence (Baker et al., 2016; Baker et al.,  
39 2011), can have a positive impact across multiple tissues and ameliorate several chronic  
40 diseases of ageing at the same time. There are well-known key hallmarks of ageing, such as  
41 genomic instability, telomere attrition, epigenetic alterations, loss of proteostasis, de-  
42 regulated nutrient sensing, mitochondrial dysfunction, cellular senescence, stem cell  
43 exhaustion and altered intercellular communication(Lemoine, 2021; López-Otín, Blasco,  
44 Partridge, Serrano, & Kroemer, 2013). However, a major challenge in ageing research is to  
45 identify where and when these potentially pathological changes start and when the tipping  
46 point between homeostasis and loss of function takes place (Rando & Wyss-Coray, 2021).  
47 Additionally, several lines of evidence suggest there may be specific tissues where age-  
48 related changes start earlier, potentially influencing others (de Jong, Gonzalez-Navajas, &  
49 Jansen, 2016; Rera, Azizi, & Walker, 2013). One example is the gut, which has been  
50 suggested to be a trigger for multiple organ failure (Cardoso et al., 2008). Evidence suggests  
51 that the kinetics of ageing can vary dramatically between cells, tissues (Shokhirev &  
52 Johnson, 2021; M. J. Zhang, Pisco, Darmanis, & Zou, 2021) and individuals, and that this is  
53 influenced not only by intrinsic but also extrinsic factors, recently discussed elsewhere  
54 (Rando & Wyss-Coray, 2021). These considerations are of particular importance when the  
55 aim is to understand how changes in ageing lead to disease and how, when and where to  
56 intervene. This is crucial in order to shift towards a more preventive form of medicine,  
57 which is a current global ambition (Rudnicka et al., 2020), aiming to match the dramatic  
58 increase of lifespan we have experienced in the past century, with an equivalent increase in  
59 years of healthy living, i.e, healthspan (England, 2017).

60 Tissue-specific transcriptomics analysis over the lifecourse can offer important insights  
61 into the downstream molecular mechanisms potentially driving the pathology of ageing.

62 Significant research is being dedicated to these approaches in different animal models,  
63 including in mice (Schaum et al., 2020; Tabula Muris, 2020; M. J. Zhang et al., 2021).  
64 Different animal models may offer different insights into the mechanisms of ageing, and  
65 some models may be better suited to explore the role of specific human hallmarks of  
66 ageing. The role of telomere attrition in natural ageing can be considered a hallmark of  
67 ageing that may benefit from additional and complementary models, beyond the mouse  
68 (Forsyth, Wright, & Shay, 2002; Gomes et al., 2011; Sullivan et al., 2021). Once such model is  
69 the zebrafish that, like humans, age and die in a telomerase-dependent manner (Anchelin et  
70 al., 2013; Carneiro, de Castro, & Ferreira, 2016; Madalena C Carneiro et al., 2016; Henriques,  
71 Carneiro, Tenente, Jacinto, & Ferreira, 2013; Henriques & Ferreira, 2012). Restricted  
72 telomerase expression and function are key determinants of natural ageing in humans,  
73 underpinning multiple age-related diseases (Blackburn, Epel, & Lin, 2015). However, the role  
74 and the dynamics of telomerase-dependent changes that may contribute to tissue-specific  
75 ageing are still poorly understood. This is partially due to the fact that telomerase appears  
76 to have multiple functions in the cell, that go beyond the maintenance of telomere length,  
77 recently reviewed elsewhere (Segal-Bendirdjian & Geli, 2019).

78 Telomerase is best known for its telomere-dependent function (i.e. canonical  
79 functions), acting as a reverse transcriptase, maintaining telomere length through its  
80 catalytic domain (TERT protein) and RNA template (TERC) (Greider & Blackburn, 1985).  
81 Telomeres are (TTAGGG)<sub>n</sub> DNA repeats that together with a complex of proteins (known as  
82 Shelterin) create a “cap-like” structure at the end of linear chromosomes (de Lange, 2004),  
83 preventing the ends of linear chromosomes from being recognised as deleterious DNA  
84 double strand breaks (Ferreira, Miller, & Cooper, 2004). However, in humans, due to time-  
85 and cell-specific-limited telomerase expression, telomeres shorten with ageing, leading to  
86 proliferative exhaustion and replicative senescence (Bodnar, 1998; d'Adda di Fagagna et al.,  
87 2003). Importantly, there is accumulation of cellular senescence with ageing in humans  
88 (Dimri et al., 1995) and senescence has been linked to several age-associated diseases  
89 (Ovadya & Krizhanovsky, 2014). Additionally, short telomeres themselves can lead to de-  
90 regulated gene expression, particularly in genes near the chromosome ends, due to loss of  
91 the “telomere positioning effect” (TPE), which is known to regulate gene expression of  
92 genes at least up to 10MB away from the chromosome ends (Robin et al., 2014).

93 Growing evidence now suggests that telomerase also has activity independent of its  
94 action at telomeres, known as non-canonical (Goodman & Jain, 2011; Romaniuk et al., 2018;  
95 Segal-Bendirdjian & Geli, 2019; Sung, Ali, & Lee, 2014). In the nucleus, these non-canonical  
96 functions include transcriptional regulation of genes involved in inflammation, including  
97 nuclear factor kappa B (NFkB) and tumour necrosis factor alpha (TNF $\alpha$ ) (Deacon & Knox,  
98 2018; Ghosh et al., 2012; Mattiussi, Tilman, Lenglez, & Decottignies, 2012), as well as genes  
99 involved in cell proliferation (Choi et al., 2008; Sarin et al., 2005) and cell survival (Cao, Li,  
100 Deb, & Liu, 2002; Rahman, Latonen, & Wiman, 2005). Telomerase can also translocate to  
101 the mitochondria, where it has been shown to play a protective role against DNA damage  
102 and oxidative stress (Ahmed et al., 2008; Haendeler et al., 2009).

103 As tissues with high cellular turnover present accelerated telomere erosion (Bodnar,  
104 1998; H. W. Lee et al., 1998), it is reasonable to think that telomerase functions are likely to  
105 primarily affect highly proliferative tissues. Accordingly, premature accumulation of critically  
106 short telomeres has been identified in high proliferative tissues such as the gut, in tert-  
107 deficient animal models. Nonetheless, the role of telomerase and telomeres is not restricted  
108 to highly proliferative tissues. In the brain, considered a predominately post-mitotic tissue,  
109 telomerase has been shown to have a protective role against excitotoxicity (Eitan et al.,  
110 2012), oxidative stress (Spilsbury, Miwa, Attems, & Saretzki, 2015), and neuronal death (J.  
111 Lee et al., 2010), all involved in neurodegenerative diseases. Studies in late-generation  
112 telomerase-deficient mice have suggested that limited telomerase expression is associated  
113 with premature accumulation of senescence-associated markers in different cell  
114 populations including Purkinje neurons, cortical neurons and microglia (De Felice et al.,  
115 2014; Jaskelioff et al., 2011; Jurk et al., 2012; Raj et al., 2015). Telomerase is therefore a  
116 promising target to promote healthy ageing in multiple tissues and so the identification of  
117 mechanisms driving telomerase-dependent ageing could enable the identification of  
118 targeted therapies to improve healthspan.

119 In this study, we aimed to determine the telomerase-dependent and -independent  
120 transcriptomic changes and their kinetics occurring during ageing, in both brain and gut  
121 within the same individuals. We hypothesised that this would allow us to identify key age-  
122 associated genes and pathways that become prematurely de-regulated in both or either  
123 tissue, providing key insights into the early stages of ageing in these tissues and likely

124 interactions. We further hypothesised that this may highlight potential common  
125 telomerase-dependent and -independent therapeutic targets for early intervention aimed at  
126 preventing age-associated dysfunction in both tissues. To address these questions, we  
127 performed RNA sequencing in whole tissues (gut and brain) of WT fish (2, 9, 22 and 35  
128 months of age) alongside telomerase mutant fish (*tert*<sup>-/-</sup>) (2, 9 and 22 months of age). *tert*<sup>-/-</sup>  
129 zebrafish, extensively characterised elsewhere (Anchelin et al., 2013; Madalena C Carneiro  
130 et al., 2016; Henriques et al., 2013), display no telomerase activity and have significantly  
131 shorter telomeres from birth, consequently ageing and dying prematurely. Ageing is usually  
132 described as a time-dependent change in tissue homeostasis, that increases the probability  
133 of disease and death (Hayflick, 2007). However, whether the genes and pathways driving or  
134 accompanying these time-dependent changes are also consistently changing in a time-  
135 specific manner, remains unresolved (Rando & Wyss-Coray, 2021). We therefore decided to  
136 combine a time-series analysis (STEM), which allowed the identification of genes and  
137 pathways that are consistently up or down-regulated over-time, with the more traditional  
138 differential gene expression (DEGs) analysis between young and old animals. This combined  
139 strategy allowed the identification of genes that change in a monotonic, time-dependent  
140 manner (STEM), versus genes that change at specific stages of life (DEGs).

141 We show that although the gut and brain have distinct transcriptomic signatures of  
142 ageing, both tissues display hallmarks of ageing as early as 9 months in the WT zebrafish.  
143 Importantly, telomerase depletion accelerates the appearance of such hallmarks in both gut  
144 and brain. In particular, we identify stem cell exhaustion as the common principal hallmark  
145 of ageing at the early stages of ageing, in both tissues. Further, we identify altered  
146 intercellular communication, in which immunity and inflammation play a central role, as the  
147 main telomerase-dependent hallmark of ageing common between the gut and brain. Finally,  
148 we conclude that the gut displays telomerase-dependent hallmarks of ageing at an earlier  
149 age than the brain and that these include changes in several key genes that have also been  
150 included in the GenAge database, a benchmark curated database that included genes  
151 involved in ageing across different organisms, including in humans (Tacutu et al., 2018).  
152 Finally, we identify 7 key gene changes common between the gut and brain at the early  
153 stages of ageing, namely *ccnb1*, *kif2c*, *serpinh1a*, *temem37*, *si:ch211-5k11.8*, *cfap45* and  
154 *eif4ebp3l*.

155

## 156 **2 RESULTS**

### 157 **2.1 Identification of monotonic, time-dependent gene signatures and process** 158 **changes with ageing in the zebrafish gut and brain**

159 In order to identify telomerase-dependent and -independent transcriptional  
160 signatures of ageing in the zebrafish gut and brain, we performed RNA-Sequencing of whole  
161 tissues, throughout the lifespan of WT and telomerase-deficient (*tert*<sup>-/-</sup>) fish (**Fig. 1 and**  
162 **source data**). While *tert*<sup>-/-</sup> fish have a lifespan of c. 12-20 months, WT fish typically die  
163 between c. 36-42 months of age (Madalena C Carneiro et al., 2016). The data shown here  
164 include 4 age-groups of WT (2, 9, 22 and >30 months), corresponding to young, adult,  
165 median lifespan and old. As the *tert*<sup>-/-</sup> fish have a shorter lifespan compared with their WT  
166 siblings, the data include 3 age-groups of telomerase-deficient fish (2, 9, and 22 months),  
167 which correspond to young, medium lifespan and old. Each group has a sample size of 3  
168 animals and the brains and guts from within the same groups of animals were used (**Fig 1A**).  
169 The reads were aligned to the latest zebrafish genome build GRCz11 (Lawson et al., 2020)  
170 and resulted in uniquely mapped read percentages ranging from 92.1% to 94.4%, which is a  
171 readout of good quality (Lawson et al., 2020). All samples had at least 10 million uniquely  
172 mapped reads, except G11 which had around 8 million. Further quality control, using a  
173 principal component analysis (PCA) including all the samples, revealed that one of the gut  
174 samples clustered with the brain samples, and not with the gut samples (**Fig. 1B**). This was  
175 considered to be a technical error and this sample (G7) was therefore excluded from further  
176 analysis. To analyse the overall impact of the genotype and age on transcriptomic  
177 regulation, we then performed a PCA in the samples from the gut and brain, separately. We  
178 further observed that some samples cluster *per* age, but there are some genotypes that  
179 separate quite distinctly, despite being of the same age (**Fig 1C and D**). As an example, the  
180 WT and *tert*<sup>-/-</sup> gut samples are quite distinct, and the *tert*<sup>-/-</sup> 2-month samples cluster closely  
181 to the WT at 9 months than the WT at 2 months (**Fig 1C**), providing the first hint of an  
182 acceleration of the ageing transcriptomic profile in the *tert*<sup>-/-</sup>. We found that there was  
183 higher variability in the gut than in the brain, between samples within each age group (**Fig**  
184 **1C and D**). A summary of the number of significant differentially expressed genes (DEGs) in  
185 all samples is represented in **Fig. 1E**. How these DEGs relate to which other, how many

186 overlap and how many are in common or accelerated in the absence of telomerase (*tert*<sup>-/-</sup>),  
187 will be explored later in the manuscript.

188 To identify genes and pathways that are consistently up- or down-regulated in a time-  
189 dependent manner in natural ageing in the zebrafish gut and brain, we grouped the genes  
190 into temporal expression profiles, by time-series analysis using Short Time-series Expression  
191 Miner (STEM) software (Ernst & Bar-Joseph, 2006). To determine whether the temporal  
192 profiles were associated with specific biological processes and pathways, pathway over-  
193 representation analysis (ORA) were performed for the genes assigned to the significant  
194 STEM profiles. Enrichments of GO Biological Process (GOBP), GO Molecular Function  
195 (GOMF), GO Cellular Compartment (GOCC), Kyoto Encyclopedia of Genes and Genomes  
196 (KEGG) terms and REACTOME pathway terms were therefore analysed for each profile.  
197 Time-series analysis of WT gut identified 9 different profiles, with 2 of them containing up-  
198 regulated genes (profiles 7 and 21. Total of 523 genes), and 7 containing down-regulated  
199 genes (profiles 32, 31, 23, 9, 12, 22 and 34. Total of 11,594 genes) (**Fig. 2A1 and source  
200 data**). Interestingly, in the *tert*<sup>-/-</sup> gut, all the profiles identified by time-series analysis contain  
201 up-regulated genes (profiles 8, 6, 15 13, 12 and 11. Total of 10,317 genes) (**Fig. 2A2 and  
202 source data**). Enrichment analysis showed that the profiles containing up-regulated genes  
203 are associated with immune response, while profiles containing down-regulated genes are  
204 largely associated with proliferation, cellular response to DNA damage, and DNA damage  
205 repair, in both WT and *tert*<sup>-/-</sup> gut (**Fig. 2 A1.1, 1.2 and A2.1**). To help contextualise our  
206 analysis, we performed a further classification of enriched processes according to the  
207 hallmarks of ageing, which have been previously identified (Lemoine, 2021; López-Otín et  
208 al., 2013). This classification further strengthened the observation that the up-regulated  
209 profiles include genes mostly involved in altered intercellular communication, in which  
210 immunity and inflammation play a key role, whereas the down-regulated profiles identify  
211 stem cell exhaustion and genomic instability as the main hallmarks of ageing, to which the  
212 genes affecting proliferation, DNA damage and repair are likely to contribute (**Fig. 2 A1.1,  
213 1.2 and A2.1 and source data**).

214 In the WT brain, we identified 9 temporal profiles, 6 of them including up-regulated  
215 genes (profiles 42, 29, 40, 30, 21 and 48. Total of 7,230 genes), and 3 including down-  
216 regulated genes (profiles 1, 12 and 26. Total of 561 genes) (**Fig. 2B1 and source data**). In the

217 *tert*<sup>-/-</sup> brain, time-series analysis revealed 6 different profiles. Profiles 4, 0 and 3 containing  
218 down-regulated genes (total of 5,374 genes) and profiles 15, 12 and 11 containing up-  
219 regulated genes (total of 1,155 genes) (**Fig. 2B2 and source data**). As in the gut, up-  
220 regulated profiles reveal genes mostly involved in immune regulation and inflammation and  
221 down-regulated profiles are mostly involved in cell cycle, genome stability and DNA damage  
222 responses, in both genotypes This is further highlighted when placed into context by the  
223 analysis based on the hallmarks of ageing, where up-regulated profiles identify altered  
224 intercellular communication whereas the down-regulated ones identify stem cell exhaustion  
225 as the main hallmarks affected (**Fig 2 B1.1, 1.2; B2.1, 2.22 and source data**).

226 In summary, STEM analysis and enrichment pathways in both gut and brain ageing  
227 show a general trend towards up-regulation of genes involved in immune response and  
228 down-regulation of genes involved in cell cycle, DNA damage and repair. This general trend  
229 is recapitulated in the absence of telomerase. These mechanisms are all known contributors  
230 to the well-described altered intercellular communication, genome stability and stem cell  
231 exhaustion hallmarks of ageing, respectively (Lemoine, 2021; López-Otín et al., 2013).

232

## 233 **2.2 Comparing the hallmarks of ageing over time, in WT and *tert*<sup>-/-</sup> zebrafish gut and** 234 **brain**

235 More than just identifying the signatures of natural WT ageing in the gut and brain  
236 and identifying telomerase-dependent and -independent changes, we wanted to  
237 understand if there were particular changes occurring before others, and how their kinetics  
238 compared between the gut and the brain. In order to contextualise our analysis in the light  
239 of the well-described hallmarks of ageing, (Lemoine, 2021; López-Otín et al., 2013), we used  
240 the main hallmarks of ageing as headers in which we could group the different changes in  
241 processes that were enriched from both the STEM profiles and all DEGs. This allowed us to  
242 compare the effects of age, genotype and tissue on the evolution of the key hallmarks of  
243 ageing. When we combine all the gene changes (up- and down-regulated) and associated  
244 biological processes affected (**Fig. 3 and source data**), we observe distinct tissue-specific  
245 signatures of ageing, namely in the gut (**Fig. 3A**) and brain (**Fig. 3B**), particularly when  
246 considering the time-series analysis on its own (STEM) (**Fig 3. A1 and B1**). Whereas ageing in  
247 the WT gut seems to be predominantly affected by the de-regulated nutrient sensing



248 initially, the brain displays stem cell exhaustion as the main hallmark affected at the early  
249 age of 9 months (**Fig. 3A1, B1**, respectively). When we combine the different analysis,  
250 though (**Fig. 3A3 and B3**), both gut and brain have stem cell loss as the main hallmark of  
251 ageing associated with the enriched processes found at 9 months of age, highlighting this as  
252 a potential contributor to the early stages of ageing in both tissues. Towards the end of life,  
253 both gut and brain have altered intercellular communication as the main hallmark of ageing  
254 identified. Importantly, independently of the analysis, the *tert*<sup>-/-</sup> zebrafish show accelerated  
255 hallmarks of ageing. In specific, a *tert*<sup>-/-</sup> 2-month-old gut profile is very similar to a WT 35-  
256 month-old gut profile (**Fig. 3A**). In the brain, at 2 months of age the *tert*<sup>-/-</sup> mutant also  
257 displays some of the hallmarks of ageing that also become altered in WT ageing at later  
258 ages, particularly altered intercellular communication, but the *tert*<sup>-/-</sup> brain becomes much  
259 more similar to the aged WT from the age of 9 months onwards (**Fig. 3B**). This suggests that  
260 hallmarks of ageing accelerated in the absence of telomerase are developing earlier in the  
261 gut than in the brain.

262 Finally, when we look at the overall number of gene expression changes, i.e, not just  
263 the ones associated with the hallmarks of ageing, we observe that there is a general  
264 increase in the number of changes in gene expression with ageing (**Fig 3 A4 and B4**).  
265 However, this increase does not appear to be linear. In specific, in the gut, the number of  
266 DEGs is fairly low until 9 months of age, after which there seems to be an inflexion point and  
267 the number of DEGs increases up to 5-fold in the oldest WT (>35 months) and 3-fold in the  
268 oldest *tert*<sup>-/-</sup> (22 months). In the brain, there seems to be a more gradual, consistent  
269 increase over time, both in WT and *tert*<sup>-/-</sup>. This increase in number of DEGs with ageing may  
270 be a consequence of the known de-regulation of gene expression with ageing due to de-  
271 repression of heterochromatin and/or changes in epigenetic markers.

272

### 273 **2.3 When does a *tert*<sup>-/-</sup> resemble an aged WT the most?**

274 It is of note that, even though the *tert*<sup>-/-</sup> accelerates hallmarks of ageing in the gut and  
275 brain, the set of genes identified are not necessarily the same as in WT ageing. In specific,  
276 looking at the genes at the early stages of ageing, the most significant hallmark of ageing  
277 shared between the 2 months old *tert*<sup>-/-</sup> and WT 9 months gut is nutrient sensing, and only 2  
278 up-regulated genes are in common, namely *lipca* (*Hepatic triacylglycerol lipase precursor*)

279 and *pla1a* (*phospholipase 1a*). Interestingly, hepatic lipase has been involved in  
280 atherogenesis (Santamarina-Fojo, Gonzalez-Navarro, Freeman, Wagner, & Nong, 2004) and  
281 age-related macular degeneration diseases that have been hypothesised to have a parallel  
282 response to tissue injury induced by multiple factors, including impaired immune responses,  
283 and oxidative stress (Neale et al., 2010). In line with the general de-regulated inflammatory  
284 response we see in the gut, with ageing (**Figs. 2 and 3 and source data**), *phospholipase 1a*  
285 has been reported to be up-regulated in inflamed gut tissue of Crohn's disease patients  
286 (Hong et al., 2017) and has a complex role in the regulation of immunity and inflammation  
287 (recently reviewed in (Zhao, Hasse, & Bourgoin, 2021)). In the brain, there are no genes in  
288 common between the 2 months old *tert*<sup>-/-</sup> and WT 9 months associated with altered  
289 intercellular communication or genomic instability, the 2 main hallmarks of ageing shared  
290 between the genotypes at the early stages of ageing. Following this type of analysis, we  
291 could then ask at what age does the *tert*<sup>-/-</sup> best mimic naturally aged WT, at the level of  
292 gene expression. For this, we considered the genes identified within the hallmarks of ageing  
293 and the genes classified as "other" i.e. associated with ageing but not obviously associated  
294 with the described hallmarks of ageing. We therefore analysed the overlap between all  
295 DEGs identified in the old WT (35 months) and the *tert*<sup>-/-</sup> at the different aged (2, 9 and 22  
296 months), using Venn diagrams created using the Venny 2.1 online platform (Oliveros, 2007-  
297 2015) to ask this question. We observe that the 2 months old *tert*<sup>-/-</sup> has the most genes  
298 shared with the 35 months old WT gut (59 genes in common) (**Fig. 4 A1 and Supp. Fig. 1**)  
299 whereas it is the *tert*<sup>-/-</sup> at 22 months that has the most genes shared with the 35 months old  
300 brain (112 genes in common) (**Fig. 4 B1 and Supp. Fig.1**). This similarity between the 2  
301 month and 22 months *tert*<sup>-/-</sup>, with the gut and brain, respectively, is also apparent when we  
302 just look at the pattern of the main hallmarks of ageing accelerated in the *tert*<sup>-/-</sup> (**Fig. 3, 4**  
303 **and Graphical Abstract**). Together, these data suggest that the gut is displaying telomerase-  
304 dependent hallmarks of ageing at an earlier age than the brain, consistent with what would  
305 be expected for a high *versus* low proliferative tissue. Of relevance, in the brain, of the  
306 genes de-regulated in the *tert*<sup>-/-</sup> 22 month that are in common with the WT aged at 35  
307 months *ccna2* (cyclin a2), *cdk6* (cyclin-dependent kinase 6), *chek1* (checkpoint kinase 1),  
308 *mad2l1* (Mitotic spindle assembly checkpoint protein mad2a), *tacc3* (Transforming, acidic  
309 coiled-coil containing protein 3), *top2a* (DNA topoisomerase ii alpha) and *mcm2* (DNA  
310 helicase, MCM2 minichromosome maintenance deficient 2) have also been included in the

311 Human Ageing Resources databases (Tacutu et al., 2018) and are mostly located within the  
312 same cluster (green), identified using *k-means* clustering in STRING analysis (Szklarczyk et  
313 al., 2021) (**Fig 4 and source data**). Of the proteins encoded by these genes, *chek1*  
314 (Poehlmann et al., 2011), *cdk6* (Morris, Hepburn, & Wynford-Thomas, 2002), *mad2l1*  
315 (Lentini, Barra, Schillaci, & Di Leonardo, 2012) and *tacc3* (Schmidt et al., 2010) have been  
316 reported to be involved in cellular senescence. Additionally, *top2a* has been involved in  
317 neuron proliferation (Watt & Hickson, 1994) and *mcm2* depletion in mice leads to  
318 decreased proliferation in various tissue stem cell progenitors (Pruitt, Bailey, & Freeland,  
319 2007).

320

#### 321 **2.4 Analysis of telomerase (*tert*)-dependent gene changes of old age**

322 Once we identified what WT ageing looked like at the level of time-dependent gene  
323 expression changes over the life-course and the main biological processes affected, we  
324 sought to determine how much of these were likely to be telomerase-dependent. If a gene  
325 expression change or a biological process alteration is accelerated in the absence of  
326 telomerase (i.e becomes significant at an earlier age in the *tert*<sup>-/-</sup>), we consider it to be  
327 telomerase dependent, as has been described before (Madalena C Carneiro et al., 2016;  
328 Henriques et al., 2013). Conversely, if none of these pre-requisites are met, we consider the  
329 gene/process alteration to be telomerase-independent. With this in mind we performed  
330 Venn diagrams (Oliveros, 2007-2015) to identify the telomerase-dependent significant gene  
331 alterations of old age, i.e, DEGs present in the WT at 35months old, when compared with  
332 the WT young control, i.e, at 2 months of age. For this, we used the DEGs identified in the  
333 STEM profiles (i.e., genes that change monotonically, in a time-dependent manner),  
334 combined with the more traditional DEG analysis, which include all gene changes, whether  
335 they change consistently in a time-dependent manner across the lifecourse or not (called  
336 “ALL DEGs” from hereafter) (**Fig. 5 and source data**). From these analyses, we identified 50  
337 significant DEGs (out of 491; c. 10%) (present in old age (WT 35 months) that are  
338 prematurely de-regulated in the *tert*<sup>-/-</sup> gut (**Fig. 5 A**) and 100 genes (out of 428; c.23%) that  
339 are prematurely de-regulated in the *tert*<sup>-/-</sup> brain (**Fig. 5 B**). Importantly, most of these genes  
340 are directly or indirectly involved in known hallmarks of ageing (Lemoine, 2021; López-Otín  
341 et al., 2013), namely altered intercellular communication (including immunity,

342 inflammation, extra-cellular matrix), genome stability (including DNA replication and repair),  
343 stem cell exhaustion and mitochondrial dysfunction. In the gut, telomerase-dependent gene  
344 expression changes with ageing include up-regulation of genes involved in immune  
345 response, such as *tlr18* (*Toll-like receptor 18 precursor*), *sytl1* (*Synaptotagmin-like protein 1*)  
346 and down-regulation of genes involved in metabolism, such as *cyp8b1* (*Cytochrome P450,*  
347 *family 8, subfamily B, polypeptide 1*) and *igfbp2a* (*Insulin-like growth factor-binding protein*  
348 *2*) (Bertaggia et al., 2017). Within the down-regulated genes, there are other well-known  
349 genes such as *sox6* (involved in stem cell function), *vav3b* (involved in wound healing), (Fig 5  
350 **and source data**). Additionally, we identify a number of non-annotated genes, which may  
351 represent novel *tert*-dependent genes, that would require further investigation.  
352 Importantly, amongst these *tert*-dependent genes of “old age”, there are a number of  
353 homolog or closely related genes which have been previously identified in ageing datasets  
354 (Tacutu et al., 2018) such as several *igfbps* (*insulin-like growth factor binding proteins*), *igf*  
355 (*insulin growth factor*), *mapks* (*mitogen-activated protein kinases*), *tlr3* (*toll-like receptor 3*)  
356 and *nrg1* (*neuroregulin 1*).

357 In the brain, *tert*-dependent ageing gene expression changes include mostly down-  
358 regulation of genes involved in cell cycle or neurogenesis, such as *aurkb* (*aurora kinase B*),  
359 *chek1* (*checkpoint kinase 1*), *ccnb1* (*cyclin b1*), *cdk2* (*cyclin-dependent kinase 2*) and *neurod4*  
360 (*neuronal differentiation 4*), *dld* (*delta d*), *nog1* (*noggin 1*), respectively, as well as genome  
361 stability and DNA repair, such as *rad54l* (*rad54 like*), *mcm5* (*minichromosome maintenance*  
362 *complex component 5*) and *smc4* (*structural maintenance of chromosomes 4*). Up-regulated  
363 genes are mostly involved in immune response or inflammation, such as *cxcl18b* (*chemokine*  
364 *(C-X-C motif) ligand 18b*), *mhc2a* (*major histocompatibility complex class II integral*  
365 *membrane alpha chain gene*), *socs1a* (*suppressor of cytokine signalling 1a*), *irf8* (*interferon*  
366 *regulatory factor 8*) and *csf1b* (*colony stimulating factor 1b (macrophage)*). Of note,  
367 amongst these *tert*-dependent DEGs of old age, we identified *dre-mir-29b-1*, which encodes  
368 for a regulatory micro RNA 29 (mir29), widely described to be up-regulated in ageing, in  
369 response to DNA damage, alongside P53 (Ugalde et al., 2011). mir29 up-regulation with  
370 ageing can act as a protective response, limiting excessive iron-exposure and damage in  
371 neurons (Ripa et al., 2017). As for the gut, there are a number of homolog or closely related  
372 genes which have been previously identified in ageing (Tacutu et al., 2018), such as *chek1*,  
373 *mad2l1* (*MAD2 mitotic arrest deficient-like 1 (yeast)*), *dl3* (*delta like 3*), *nog* (*noggin*), *ifnb1*

374 (interferon beta), *socs2* (suppressor of cytokine signalling 2, amongst many others, which  
375 can be found in the GeneAge database.

376 Since it is known that short telomeres themselves can lead to de-regulated gene  
377 expression, particularly in genes near the chromosome ends due to loss of the “telomere  
378 positioning effect” (TPE) (Robin et al., 2014), we proceeded to map the genes identified to  
379 be de-regulated prematurely in the absence of telomerase to their chromosome location,  
380 with the aim of determining whether they located to within up to 10MB of either of the  
381 telomeric ends (**Fig. 5C1**). We found that whereas most *tert*-dependent gene changes of old  
382 age do not locate to the end of chromosomes, in both gut and brain (**Fig. 5C2 and C3**).  
383 However, there are significantly more *tert*-dependent genes located at the end of  
384 chromosome in the gut than in the brain, (**Fig. 5 C4**). This is consistent with gut being a more  
385 proliferative tissue, where telomeres are likely to shorten more, which would be particularly  
386 exacerbated in the absence of *tert*, leading to a higher probability of TPE contributing to  
387 gene transcription alterations.

## 388 **2.5 Transcriptional changes in common between the gut and brain at the early and** 389 **late stages of ageing**

390 Even though the aged phenotype is something usually observed late in life, the  
391 underlying molecular and cellular mechanism driving these changes can, arguably, start  
392 from the moment you are born (Gladyshev, 2021). To understand what significant  
393 transcriptional changes are taking place in the gut and brain and, in particular, in common  
394 between the gut and brain, we compared all DEGs and STEM DEGs in these tissues at the  
395 earliest time point we detect significant changes (9 months) and at the late stages of ageing,  
396 i.e, at the latest time point analysed of 35 months (**Fig 6, Supp Fig 3 and source data**). We  
397 identified 7 gene changes in common between WT gut and brain at the early stages of  
398 ageing (9 months of age). In specific, we identified 5 down-regulated genes, namely *ccnb1*,  
399 *kif2c*, *serpinh1a*, *temem37* and *si:ch211-5k11.8*, and 2 up-regulated genes, namely *cfap45*  
400 and *eif4ebp3l*. Of these, *ccnb1* (G2/mitotic-specific cyclin-B1) and *kif2c* (Kinesin-like protein)  
401 are both proteins involved in cell-cycle progression. Whereas *Ccnb1* has been reported to be  
402 involved in normal stem-cell/progenitor maintenance in the brain (Hagey et al., 2020) and  
403 gut (Basak et al., 2014); *kif2c* can act as a DNA damage repair protein, and, accordingly, its  
404 depletion leads to significant accumulation of DNA damage (Zhu et al., 2020). STRING

405 analysis suggests these proteins are likely to be co-expressed in a variety of organisms  
406 including zebrafish and humans, highlighting potential functional links (**Fig 6 B and source**  
407 **data**). The downregulated *elf4ebp3l* gene (Eukaryotic translation initiation factor 4E-binding  
408 protein 3-like) encodes a repressor of translation and is inhibited in response to TORC1  
409 (mammalian target of rapamycin complex 1) (Boutouja, Stiehm, & Platta, 2019).

410 At “late stages” of ageing, we identified 23 gene changes in common between the gut  
411 and brain. Of these, STRING analysis identified 2 main protein network interactions, namely  
412 a link between cd59 and cd99l2 and link between il2rb and b2m. In specific, cd59 and cd99l,  
413 which our data show to be downregulated in old age, in both gut and brain, have both been  
414 cited in the literature as markers of newborn neurons and oligodendrocyte progenitor cells,  
415 respectively, in a single-cell transcriptomic analysis of the adult zebrafish brain (Lange et al.,  
416 2020). In the gut, cd59, also known as protectin, has been shown to be downregulated in  
417 the gut epithelium of ulcerative colitis and Chron’s disease patients and thought to render  
418 the tissue susceptible to inflammatory damage (Scheinin et al., 1999). cd99 has been shown  
419 to be a key molecule in modulating monocyte migration through endothelial junctions  
420 (Schenkel, Mamdouh, Chen, Liebman, & Muller, 2002) and monocyte differentiation to  
421 macrophages is known to be triggered by endothelial transmigration (Gerhardt & Ley, 2015;  
422 Li et al., 2020), including in the brain via migration through the blood-brain barrier (Ifergan  
423 et al., 2007). Il2rb and b2m, which our data show to be up-regulated in both gut and brain at  
424 the “late stages” of ageing, are key molecules involved in adaptive and innate immune  
425 function. Whilst the IL2R beta is important for T-cell mitogenic response to IL-2, the b2m  
426 (Beta-2-microglobulin) protein is a component of the major histocompatibility complex I  
427 (MHCI), involved in antigen presentation. Intriguingly, b2m has been shown to be present in  
428 a soluble free-form, and has been found to be systemically increased with ageing in humans  
429 and in individuals with neurodegenerative diseases (Smith et al., 2015). Importantly,  
430 heterochronic parabiosis experiments between young and old mice suggest that increased  
431 b2m with ageing leads to cognitive impairment and neurodegeneration, and has hence been  
432 identified as a systemic pro-ageing factor (Smith et al., 2015). Additionally, increased IL2  
433 receptor expression has been shown to contribute to CD4 differentiation and exhaustion of  
434 their naïve pool and therefore ability to respond to infection with ageing, in humans  
435 (Pekalski et al., 2013; H. Zhang, Weyand, & Goronzy, 2021).

436

### 437           **3 DISCUSSION**

438           In this study, we used RNA sequencing analysis to determine the kinetics of  
439 telomerase-dependent and -independent transcriptomic changes occurring during WT  
440 ageing in brain and gut tissues, using the zebrafish as a model. We hypothesised that this  
441 would allow us to identify key age-associated genes and pathways that become prematurely  
442 de-regulated in both or either tissue, providing key insights into the early stages of ageing in  
443 each tissue and highlight potential interactions.

444

#### 445           **3.1 STEM versus all DEGs analysis**

446           Ageing can be described as a time-dependent change in tissue homeostasis, that  
447 increases the probability of disease and death (Hayflick, 2007). Whether the genes and  
448 pathways driving these time-dependent changes are also consistently changing in a time-  
449 specific manner, remains unresolved. To account for both possibilities, we performed a  
450 time-series analysis (STEM) and then combined this with the more traditional differential  
451 gene expression (DEGs) analysis between young and old animals. Even though the gene  
452 changes identified with the STEM analysis were also picked up by the traditional DEGs  
453 analysis, the STEM analysis provided a much tighter, restrictive view of the transcriptomic  
454 signatures of ageing. In the gut, particularly, the main hallmarks of ageing identified using  
455 the STEM analysis are quite different from the ones using the traditional all DEGs. In  
456 particular, STEM analysis identifies mitochondrial dysfunction and de-regulated nutrient  
457 sensing as the main hallmarks of WT ageing at the earlier stages of ageing in the gut (WT 9  
458 months), whereas all DEGs analysis identified stem cell dysfunction as the principal hallmark  
459 de-regulated at that age. The significance of these differences is difficult to judge, but it can  
460 suggest that changes in genes affecting mitochondrial function and nutrient sensing have a  
461 mostly monotonic trajectory in gut ageing, whereas the ones involved in stem cell  
462 maintenance can have different behaviours at different times throughout life. Nevertheless,  
463 this difference was not observed in the WT brain or in the *tert*<sup>-/-</sup> ageing, where STEM and all  
464 DEGs analysis led to very similar conclusions regarding the identity or kinetics of the main  
465 hallmarks of ageing affected. Importantly, the kinetics of gene changes and processes  
466 identified in our data match very well to the phenotypes of ageing previously reported in  
467 the *tert*<sup>-/-</sup> and WT ageing. In particular, in the gut, impaired cell proliferation in the gut is one

468 of the first *tert*-dependent phenotypes of ageing identified, followed by cellular senescence  
469 and inflammation later in life (Madalena C Carneiro et al., 2016; Henriques et al., 2013).  
470 Moreover, the recently reported *tert*-dependent changes in macrophage immune activation  
471 and increased gut permeability (Pam S. Ellis, 2022) are consistent with key *tert*-dependent  
472 gene changes of old age identified here. An example of such genes are *cd99*, potentially  
473 involved in macrophage differentiation via trans-endothelial migration (Gerhardt & Ley,  
474 2015; Li et al., 2020; Schenkel et al., 2002); and *cldn5a* (claudin 5), involved in tight-junctions  
475 (Lu, Ding, Lu, & Chen, 2013).

476

### 477 **3.2 Main hallmarks of ageing**

478 A simplistic prediction of how the kinetics of the hallmarks of ageing would behave  
479 over the lifecourse could be that, at early ages, we would detect more changes affecting the  
480 primary hallmarks of ageing, i.e, the “causes of damage”, namely genomic instability,  
481 telomere attrition, epigenetic alterations and loss of proteostasis. At the last stages, one  
482 could predict that we would detect more significant changes in the integrative hallmarks,  
483 i.e, the “culprits of the phenotype”, namely stem cell exhaustion and altered intercellular  
484 communication, of which inflammation is a key component, as described in (López-Otín et  
485 al., 2013). However, either separately or combined, neither STEM nor all DEGs analysis show  
486 this. Our combined analyses show that most of the gene changes occurring at the early  
487 stages of WT ageing are observed from 9 months and are mostly involved in stem cell  
488 maintenance, in both gut and brain. One potential explanation for this observation is that  
489 our qualitative analysis was not able to distinguish between such hallmarks or is under-  
490 estimating the primary hallmarks. Another explanation comes from the relatively low  
491 sample size used for each time-point and the heterogeneity of individuals physiology  
492 amongst each population. As recently showed in (Dambrose et al., 2016), zebrafish age  
493 following the two-phase model first proposed flies (Tricoire & Rera, 2015), based on the  
494 age-related intestinal permeability assessed using the Smurf assay they previously described  
495 (Rera, Clark, & Walker, 2012). Moreover, we have recently shown that gut permeability with  
496 ageing, in zebrafish, is accelerated in the absence of telomerase (*tert*<sup>-/-</sup>) (Pam S. Ellis, 2022).  
497 Following this model and considering the longevity curve from the population we sampled,  
498 the proportion of Smurfs might have been, approximately, <10% at 2 month, 25% at 9



499 month, 50% at 22 months and >80% at 35 months, based on previous work in flies (Rera et  
500 al., 2012). If we were to translate these findings to zebrafish, then the chances to have  
501 selected at least 1 Smurf by accident would be approximately 27% at 2 months, 57% at 9,  
502 86% at 22 and 99% at 35%. This could contribute to the heterogeneity or potential bias  
503 towards having more of a specific ageing signature over another (Smurf versus non-Smurf).

504 At first glance, it is surprising that telomere dysfunction is not picked up as a main  
505 hallmark of ageing in the telomerase mutant model. However, this may simply be the  
506 reflection of the number of genes that have been directly implicated in each of these  
507 hallmarks. In specific, there are a lot less genes that one would identify as directly involved  
508 in telomere dysfunction, when compared to stem cell dysfunction, for example. The main  
509 culprits for telomere dysfunction would be telomerase and the shelterin components,  
510 whereas for stem cell dysfunction, all the cell cycle and DNA damage repair proteins can  
511 play a role. For example, *chek1*, *fxr1* and *daxx*, which are all de-regulated in the old WT gut  
512 and brain (*chek1*) (**see source data**), have all been identified as potential regulators of  
513 telomeres (Nersisyan et al., 2019). Yet, because that is not the main function one would  
514 attribute to such genes, these would have been missed as part of the telomere dysfunction  
515 hallmark of ageing. Additionally, it is not possible to distinguish from just looking at lists of  
516 DEGs if such gene was de-regulated due to telomere dysfunction in the first place, or if its  
517 dysfunction will affect telomere function indirectly. These are some of the considerations  
518 that highlight the complexity of ageing and the non-linearity of how the hallmarks of ageing  
519 may drive ageing as well as each other and it is important to have them in mind when  
520 interpreting our analyses. Nevertheless, at the later stages of WT ageing (>35 months),  
521 altered intercellular communication, a previously described “culprit of the phenotype” is  
522 indeed the most significant hallmark of ageing detected in common between the gut and  
523 brain. Finally, in terms of the progression hallmarks of ageing, different hallmarks may play  
524 more prominent roles at specific times of life, and may be replaced by others at other times,  
525 explaining why we don’t necessarily always see a linear accumulation of the different  
526 hallmarks of ageing over-time. This is particularly evident in the gut, where stem cell  
527 exhaustion is the main hallmark identified by the combined STEM and ALL DEGs analysis,  
528 and it is barely represented at the later stages of life. In the brain, the progression seems to

529 be more linear, though, and most hallmarks present at the early time point of 9 months  
530 remain until old age, when other hallmarks are further added.

531

### 532 **3.3 Telomerase- and/or telomere-dependent changes with ageing**

533 If a gene expression changes or a biological process alteration is accelerated in the  
534 absence of telomerase (i.e becomes significant at an earlier age in the *tert*<sup>-/-</sup>), we considered  
535 it to be telomerase dependent. If we take a step back and look at the processes and, in turn,  
536 hallmarks of ageing affected in the absence of telomerase, it becomes clear that the *tert*<sup>-/-</sup> is  
537 indeed accelerating many of these changes. It is particularly evident when we look at the pie  
538 charts depicting the different hallmarks of ageing affected at each time point in WT versus  
539 *tert*<sup>-/-</sup>. Here, it is striking how a 2-month-old *tert*<sup>-/-</sup> gut resembles a WT gut at the old age of  
540 35 months, and how a 9- and 22-month-old *tert*<sup>-/-</sup> brain resembles an old WT brain at 35  
541 months. This is further highlighted by the further comparison we performed, where we  
542 asked at which age does the *tert*<sup>-/-</sup> share more gene expression changes with the WT old  
543 (>35 months). In this analysis, we show that the 2 months old *tert*<sup>-/-</sup> has the most gene  
544 expression changes shared with the 35 months old WT gut, whereas it is the *tert*<sup>-/-</sup> at 22  
545 months that has the most gene expression changes shared with the 35 months old WT  
546 brain. This suggests that the gut is displaying telomerase-dependent hallmarks of ageing at  
547 an earlier age than the brain, which is consistent with what would be expected for a high  
548 *versus* low proliferative tissue. Accordingly, when looking at the specific gene changes  
549 accelerated in the absence of *tert*, i.e, we identify significantly more *tert*-dependent genes  
550 located near the ends of chromosomes in the gut than in the brain, and therefore more  
551 liable to have been altered due to telomere shortening. In the future, it would be insightful  
552 to test how many of the *tert*-dependent gene changes occur due to non-canonical functions  
553 of telomerase involved in transcriptional regulation.

554 Nevertheless, *tert*-dependent gene changes in both tissues are still a minority, serving  
555 as a reminder that “all roads lead to Rome”, and one should exercise caution when trying to  
556 identify genes influencing the natural process of ageing using premature ageing models. It is  
557 not necessarily the same genes influencing the processes of ageing in these models, even if  
558 the processes and phenotypes are accelerated. We should also have this in mind when we  
559 compare the sets of genes identified in this study with those previously identified as

560 implicated in human ageing, and not necessarily be surprised if only a small percentage of  
561 those are shared. One could argue that it is more important that the processes are shared.  
562 Nevertheless, we do identify many gene changes shared between zebrafish and human  
563 ageing databases as highlighted throughout the results' section.

#### 564 **3.4 Which genes to focus on if we were to target age-associated dysfunction in the** 565 **gut and brain.**

566 As a final step in our analysis, we wanted to identify common gene expression  
567 changes between the gut and the brain at the earliest stages of ageing, in our case, from the  
568 age of 9 months. We hypothesised that this may highlight potential common therapeutic  
569 targets for early intervention to prevent age-associated dysfunction in both tissues. We  
570 identified 7 significant DEGs in common between the gut and brain at 9 months of age, 5  
571 down-regulated (*ccnb1*, *kif2c*, *serpinh1a*, *si:ch211-5k11.8* and *tmem37*) and 2 up-regulated  
572 (*cfap45* and *eif4ebp3l*). We could then hypothesise that restoring expression of these genes  
573 to youthful levels would have a positive impact on delaying or ameliorating the  
574 development of ageing phenotypes in both these tissues at the same time. Of note, we  
575 identified that, amongst these, *ccnb1* and *eif4ebp3l* were telomerase-dependent changes in  
576 the brain. If so, one could hypothesise that telomerase re-activation in the brain should  
577 restore these genes to young WT levels and potentially contribute to amelioration of *ccnb1*-  
578 and *eif4ebp3l*-dependent ageing phenotypes in the brain.

579

#### 580 **4 CONCLUSIONS**

581 We provide the first systematic analysis of transcriptomic changes throughout the  
582 lifespan of zebrafish in the gut and brain of the same group of individuals, leading to the  
583 identification of key genes and processes likely involved in driving the ageing process in  
584 these tissues. Many of these genes have previously identified in human ageing databases  
585 and many of them are potentially new genes of ageing, which will have to be experimentally  
586 tested in relevant model organisms. This analysis and the open access availability of its  
587 source and raw data should provide a key steppingstone and framework supporting future  
588 work for understanding the ageing process and using zebrafish for studying ageing.

589

#### 590 **5 MATERIALS AND METHODS**

## 591 **5.1 Zebrafish husbandry, genotypes and ages**

592 Zebrafish were maintained at the standard conditions of 27-28°C, in a 14:10 hour  
593 light-dark cycle, and fed twice a day with *Artemia* (live rotifers) and Sparus (dry food). All  
594 the experiments were performed in the University of Sheffield. All animal work was  
595 approved by local animal review boards, including the Local Ethical Review Committee at  
596 the University of Sheffield (performed according to the protocols of Project Licence  
597 70/8681).

598 Two strains of adult zebrafish (*Danio rerio*) were used for these studies: wild-type  
599 (WT; AB strain) and *tert*<sup>-/-</sup> (*tert*<sup>AB/hu3430</sup>). Wild-type fish were obtained from the Zebrafish  
600 International Resource Center (ZIRC). The *telomerase* mutant line *tert*<sup>AB/hu3430</sup> was generated  
601 by *N*-ethyl-nitrosourea mutagenesis (Utrecht University, Netherlands (Wienholds et al.,  
602 2003)). It has a T→A point mutation in the *tert* gene and is available at the ZFIN repository,  
603 ZFIN ID: ZDB-GENO-100412-50, from ZIRC. The fish used in this study are direct descendants  
604 of the ones used previously<sup>29,30</sup>, by which point it had been subsequently outcrossed five  
605 times with WT AB for clearing of potential background mutations derived from the random  
606 ENU mutagenesis from which this line was originated. The *tert*<sup>hu3430/hu3430</sup> homozygous  
607 mutant is referred to in the paper as *tert*<sup>-/-</sup> and was obtained by incrossing  
608 our *tert*<sup>AB/hu3430</sup> strain. Genotyping was performed by PCR of the *tert* gene<sup>13,14</sup>. In order to  
609 study age-related phenotypes in the zebrafish gut and brain, we used >30 months old fish  
610 for what we consider old in WT (in the last 25-30% of their lifespan), and we considered the  
611 *tert*<sup>-/-</sup> old fish at the equivalent age (>22 months), which approximately corresponds to the  
612 last 25-30% of their lifespan. In specific, 'Old' was defined as the age at which the majority  
613 of the fish present age-associated phenotypes, such as cachexia, loss of body mass and  
614 curvature of the spine. These phenotypes develop close to the time of death and are  
615 observed at >30 months of age in WT and at >22 months in *tert*<sup>-/-</sup> (Madalena C Carneiro et  
616 al., 2016; Henriques et al., 2013).

617

## 618 **5.2 Tissue dissection and RNA extraction**

619 Animals from various age-groups were used for RNA-Sequencing (WT at 2, 9, 22 and  
620 >30 months of age; and *tert*<sup>-/-</sup> at 2, 9 and 22 months of age). Three biological replicates were  
621 used per group. Fish were culled by overdose of MS-222, followed by confirmation of death.

622 Then, the whole tissues were rapidly dissected in cold PBS (Sigma-Aldrich), transferred to a  
623 microcentrifuge tube containing 100 µl of Trizol (Thermo Fisher Scientific), snap-frozen in  
624 dry ice and stored at -80°. To isolate the RNA, extra 50 µl of Trizol was added to each  
625 sample, and the tissue was homogenized with a mechanical homogenizer (VWR  
626 International) and a 1.5 pestle (Kimble Chase, Vineland, NJ, USA). After 5 min incubation at  
627 room temperature (RT), 30 µl of chloroform (1:5, VWR International) was added and the  
628 samples were incubated for further 3 min at RT before centrifuged at 13,000g, for 30 min, at  
629 4°C. Isopropanol (Thermo Fisher Scientific) was then added to the aqueous phase of the  
630 solution, and the resultant mix was incubated for 10 min at RT, before centrifuged (13,000g  
631 for 15 min at 4°C). Finally, the pellet was twice washed in 250 µl of ice cold 75% ethanol and  
632 left to air-dry, before resuspended in 14 µl of nuclease-free water. RNA integrity was  
633 assessed with the bioanalyzer Agilent 2100 Bioanalyzer (Agilent, Santa Clara, CA, USA). All  
634 the samples had a RNA integrity number (RIN) ≥9.

635

### 636 **5.3 RNA-Sequencing**

637 The RNA-Sequencing was performed at the *Genomics and Sequencing facility* of  
638 Sheffield Institute for Translational Neuroscience (SITraN). Library preparation was  
639 performed following the Illumina methodology. mRNA was extracted from 500 ng of RNA  
640 with oligo-dT beads, capturing poly(A) tails, using the NEBNext Poly(A) mRNA Magnetic  
641 Isolation Module (New England Biolabs Inc). cDNA libraries were made with the NEBNext®  
642 Ultra™ RNA Library Prep Kit for Illumina, following the manufacturer's instructions (New  
643 England Biolabs Inc). The samples were then sequenced on an Illumina HiSeq SQ, using a  
644 high output run and sequencing by synthesis V3 chemistry on a single 100 bp run. The data  
645 was imported into a FASTQ file format in order to perform the analysis.

646

### 647 **5.4 RNA-Sequencing analysis**

648 **5.4.1 Data processing.** Quality control was performed using MultiQC version 1.9.  
649 Cutadapt version 3.0 was used for trimming the first 13 bases from the reads to remove  
650 poor quality base pairs in the reads. Read alignment was performed as follows. Single-end  
651 reads were aligned against the reference genome *Danio rerio*.GRCz11.dna.  
652 primary\_assembly.fa using STAR. A bespoke alignment index was built using annotation file

653 Danio\_rerio.GRCz11.103.gtf and an expected read length of 88 bp. Ht-seq count was run in  
654 non-stranded mode to obtain *per gene* read counts.

655 **5.4.2 Differential expression.** To identify signatures of ageing, WT gut and brain  
656 samples were subjected separately to DESeq2 analysis, comparing the time points 9, 22 and  
657 >30 months with the time-point of 2 months. Then, *tert*<sup>-/-</sup> samples at 2, 9 and 22 months  
658 were contrasted with WT at 2 months, in order to identify telomerase-dependent ageing  
659 processes.

660 **5.4.3 Time-series analysis.** Short Time-series Expression Miner (STEM) software was  
661 used to assign genes to predefined expression profiles genes based on their expression  
662 across the time points. For this, the 2 months' time-point was used as the zero time point  
663 for the analysis. The maximum number of model profiles was set to 50; the maximum unit  
664 change in model profiles between time points was set to 2; and the minimum absolute log  
665 ratio of expression was set to 1.0, with change based on maximum – minimum. Significance  
666 level of the model profiles was set to 0.05 with Bonferroni correction. Minimum correlation  
667 for profile clustering was set to 0.7. The statistically significant temporal profiles were  
668 visualised as line plots using ggplot2. Median expression fold change values of the genes in  
669 each profile were shown on the plots with a thicker line.

670 **5.4.4 Enrichment analysis of temporal profiles from STEM.** Enrichment analysis was  
671 performed using all the differentially expressed genes (DEGs) and using the genes identified  
672 in the STEM analysis, separately. Gee-set over-representation analysis (ORA) of GO  
673 Biological Process (GOBP), GO Molecular Function (GOMF), and GO Cellular Compartment  
674 (GOCC) terms were performed using the enrichGO function of clusterProfiler package  
675 version 3.18.0. Minimum and maximum gene set sizes were set to 10 and 500, respectively.  
676 Results were simplified using the simplify function of clusterProfiler with the similarity cut-  
677 off set to 0.7 and minimum adjusted p-value used as the feature for selecting the  
678 representative terms. Enrichment results with adjusted p-values below 0.05 and at least 3  
679 core enrichment genes were considered significantly enriched. ORA of KEGG and  
680 REACTOME pathway terms were performed using the enrichKEGG and enrichPathway  
681 functions of clusterProfiler. Minimum and maximum gene set sizes were set to 10 and 500,  
682 respectively. The same significance criteria for the enrichments were used as for the GO  
683 term enrichments. Results of the enrichment results were visualised as barplots or as pie

684 charts. Barplots were made using the `ggbarplot` function of R package (R studio version  
685 2021.09.2), `ggpubr` version 0.4.0, showing a maximum of five pathways with adjusted p-  
686 value below 0.05 *per* pathway category. Pie charts were made using Prism GraphPad version  
687 9.0.

#### 688 **5.4.5 Protein-protein interaction network analysis**

689 The search tool for retrieval of interacting genes (STRING) (<https://string-db.org>)  
690 database, which integrates both known and predicted PPIs, was used to predict functional  
691 interactions of proteins (Szkarczyk et al., 2021). Active interaction sources, including text  
692 mining, experiments, databases, and co-expression as well as species limited to “*Danio*  
693 *rerio*” and an interaction score > 0.7 (high confidence) were applied to construct the PPI  
694 networks. The network was further clustered using *k-means* clustering to a specific number  
695 of up to 3 clusters.

#### 696 **5.4.6 Venn Diagram analysis**

697 Venn Diagram analysis was performed using the online tool Venny 2.1.0 – BioinfoGP  
698 (<https://bioinfoqp.cnb.csic.es/tools/venny/>)(Oliveros, 2007-2015).

699

#### 700 **5.4.7 Statistical analysis**

701 A chi-square test was used in **Fig 5** to compare between the relative chromosome  
702 location of telomerase-dependent genes in the gut and brain, using raw data values, even  
703 though it is the % that is represented in the graphs, to ensure accurate analysis. P value  
704 <0.05 was considered significant and denoted with a \*, whereas ns was used to denote non-  
705 significant differences.

706

#### 707 **ACKNOWLEDGEMENTS**

708 The authors would like to acknowledge Genevia Technologies Oy for the main bulk of  
709 RNA sequencing analysis service. We are very grateful to Joao Ribeiro for valuable advice  
710 regarding the many functionalities of Microsoft Excel, which greatly facilitated data analysis.  
711 This work was generously funded by a University of Sheffield PhD studentship to RRM, a  
712 Sheffield University Vice Chancellor’s Research Fellowship and a Wellcome Trust/Royal  
713 Society Sir Henry Dale Fellowship (UNS35121) to CMH. Michael Rera is supported by CNRS.

714

## 715 **AUTHOR CONTRIBUTIONS**

716 RRM and CMH conceived and designed this work; RRM performed additional RNA  
717 sequencing beyond that provided by Genevia services; RRM, MR and CMH analysed and  
718 interpreted RNA sequencing results and co-wrote the manuscript; CMH designed the figures  
719 with input from co-authors.

720

## 721 **COMPETING INTERESTS**

722 The authors declare no competing interests

723

724

## 725 **DATA AVAILABILITY STATEMENT**

726 The RNA sequencing data from this experiment were deposited in gene expression  
727 omnibus (GEO) and will be made available when in peer review.

728

## 729 **ORCID**

730 Raquel Rua Martins: <https://orcid.org/0000-0003-3952-8649>

731 Michael Rera: <https://orcid.org/0000-0002-6574-6511>

732 Catarina Martins Henriques: <https://orcid.org/0000-0003-1882-756X>

733

## 734 **SUPPORTING INFORMATION**

735 Supporting information in the form of figures, tables and source data can be found  
736 online in the Supportive information section at the end of the article

737

## 738 **REFERENCES**

739

740 Ahmed, S., Passos, J. F., Birket, M. J., Beckmann, T., Brings, S., Peters, H., . . . Saretzki, G.  
741 (2008). Telomerase does not counteract telomere shortening but protects  
742 mitochondrial function under oxidative stress. *J Cell Sci*, 121(Pt 7), 1046-1053.  
743 doi:10.1242/jcs.019372



- 744 Anchelin, M., Alcaraz-Perez, F., Martinez, C. M., Bernabe-Garcia, M., Mulero, V., & Cayuela,  
745 M. L. (2013). Premature aging in telomerase-deficient zebrafish. *Dis Model Mech*,  
746 6(5), 1101-1112. doi:10.1242/dmm.011635
- 747 Baker, D. J., Childs, B. G., Durik, M., Wijers, M. E., Sieben, C. J., Zhong, J., . . . van Deursen, J.  
748 M. (2016). Naturally occurring p16(Ink4a)-positive cells shorten healthy lifespan.  
749 *Nature*, 530(7589), 184-189. doi:10.1038/nature16932
- 750 Baker, D. J., Wijshake, T., Tchkonia, T., LeBrasseur, N. K., Childs, B. G., van de Sluis, B., . . .  
751 van Deursen, J. M. (2011). Clearance of p16Ink4a-positive senescent cells delays  
752 ageing-associated disorders. *Nature*, 479(7372), 232-236. doi:10.1038/nature10600
- 753 Basak, O., van de Born, M., Korving, J., Beumer, J., van der Elst, S., van Es, J. H., & Clevers, H.  
754 (2014). Mapping early fate determination in Lgr5+ crypt stem cells using a novel  
755 Ki67-RFP allele. *EMBO J*, 33(18), 2057-2068. doi:10.15252/embj.201488017
- 756 Bertaglia, E., Jensen, K. K., Castro-Perez, J., Xu, Y., Di Paolo, G., Chan, R. B., . . . Haeusler, R.  
757 A. (2017). Cyp8b1 ablation prevents Western diet-induced weight gain and hepatic  
758 steatosis because of impaired fat absorption. *Am J Physiol Endocrinol Metab*, 313(2),  
759 E121-E133. doi:10.1152/ajpendo.00409.2016
- 760 Blackburn, E. H., Epel, E. S., & Lin, J. (2015). Human telomere biology: A contributory and  
761 interactive factor in aging, disease risks, and protection. *Science*, 350, 1193-1198.  
762 doi:10.1126/science.aab3389
- 763 Bodnar, A. G. (1998). Extension of Life-Span by Introduction of Telomerase into Normal  
764 Human Cells. *Science*, 279(5349), 349-352. doi:10.1126/science.279.5349.349
- 765 Boutouja, F., Stiehm, C. M., & Platta, H. W. (2019). mTOR: A Cellular Regulator Interface in  
766 Health and Disease. *Cells*, 8(1). doi:10.3390/cells8010018
- 767 Cao, Y., Li, H., Deb, S., & Liu, J. P. (2002). TERT regulates cell survival independent of  
768 telomerase enzymatic activity. *Oncogene*, 21(20), 3130-3138.  
769 doi:10.1038/sj.onc.1205419
- 770 Cardoso, B. a., Gírio, a., Henriques, C., Martins, L. R., Santos, C., Silva, a., & Barata, J. T.  
771 (2008). Aberrant signaling in T-cell acute lymphoblastic leukemia: Biological and  
772 therapeutic implications. *Brazilian Journal of Medical and Biological Research*, 41,  
773 344-350. doi:10.1590/S0100-879X2008005000016
- 774 Carneiro, M. C., de Castro, I. P., & Ferreira, M. G. (2016). Telomeres in aging and disease:  
775 lessons from zebrafish. *Dis Model Mech*, 9(7), 737-748. doi:10.1242/dmm.025130
- 776 Carneiro, M. C., Henriques, C. M., Nabais, J., Ferreira, T., Carvalho, T., & Ferreira, M. G.  
777 (2016). Short Telomeres in Key Tissues Initiate Local and Systemic Aging in Zebrafish.  
778 *PLoS Genet*, 12, e1005798. doi:10.1371/journal.pgen.1005798
- 779 Choi, J., Southworth, L. K., Sarin, K. Y., Venteicher, A. S., Ma, W., Chang, W., . . . Artandi, S. E.  
780 (2008). TERT promotes epithelial proliferation through transcriptional control of a  
781 Myc- and Wnt-related developmental program. *PLoS Genet*, 4(1), e10.  
782 doi:10.1371/journal.pgen.0040010
- 783 d'Adda di Fagagna, F., Reaper, P. M., Clay-Farrace, L., Fiegler, H., Carr, P., Von Zglinicki, T., . .  
784 . Jackson, S. P. (2003). A DNA damage checkpoint response in telomere-initiated  
785 senescence. *Nature*, 426(6963), 194-198. doi:10.1038/nature02118
- 786 Dambrose, E., Monnier, L., Ruisheng, L., Aguilaniu, H., Joly, J. S., Tricoire, H., & Rera, M.  
787 (2016). Two phases of aging separated by the Smurf transition as a public path to  
788 death. *Sci Rep*, 6, 23523. doi:10.1038/srep23523

- 789 De Felice, B., Annunziata, A., Fiorentino, G., Manfellotto, F., D'Alessandro, R., Marino, R., . . .  
790 Biffali, E. (2014). Telomerase expression in amyotrophic lateral sclerosis (ALS)  
791 patients. *J Hum Genet*, *59*(10), 555-561. doi:10.1038/jhg.2014.72
- 792 de Jong, P. R., Gonzalez-Navajas, J. M., & Jansen, N. J. (2016). The digestive tract as the  
793 origin of systemic inflammation. *Crit Care*, *20*(1), 279. doi:10.1186/s13054-016-1458-  
794 3
- 795 de Lange, T. (2004). T-loops and the origin of telomeres. *Nature reviews. Molecular cell*  
796 *biology*, *5*, 323-329. doi:10.1038/nrm1422
- 797 Deacon, K., & Knox, A. J. (2018). PINX1 and TERT Are Required for TNF-alpha-Induced Airway  
798 Smooth Muscle Chemokine Gene Expression. *J Immunol*, *200*(4), 1283-1294.  
799 doi:10.4049/jimmunol.1700414
- 800 Dimri, G. P., Lee, X., Basile, G., Acosta, M., Scott, G., Roskelley, C., . . . et al. (1995). A  
801 biomarker that identifies senescent human cells in culture and in aging skin in vivo.  
802 *Proc Natl Acad Sci U S A*, *92*(20), 9363-9367.
- 803 Eitan, E., Tichon, A., Gazit, A., Gitler, D., Slavin, S., & Priel, E. (2012). Novel telomerase-  
804 increasing compound in mouse brain delays the onset of amyotrophic lateral  
805 sclerosis. *EMBO Mol Med*, *4*(4), 313-329. doi:10.1002/emmm.201200212
- 806 England, P. H. (2017). *Chapter 1: life expectancy and healthy life expectancy*. Retrieved from  
807 [https://www.gov.uk/government/publications/health-profile-for-england/chapter-1-](https://www.gov.uk/government/publications/health-profile-for-england/chapter-1-life-expectancy-and-healthy-life-expectancy#references)  
808 [life-expectancy-and-healthy-life-expectancy#references](https://www.gov.uk/government/publications/health-profile-for-england/chapter-1-life-expectancy-and-healthy-life-expectancy#references).
- 809 Ernst, J., & Bar-Joseph, Z. (2006). STEM: a tool for the analysis of short time series gene  
810 expression data. *BMC Bioinformatics*, *7*, 191. doi:10.1186/1471-2105-7-191
- 811 Ferreira, M. G., Miller, K. M., & Cooper, J. P. (2004). Indecent exposure: when telomeres  
812 become uncapped. *Mol Cell*, *13*(1), 7-18.
- 813 Forsyth, N. R., Wright, W. E., & Shay, J. W. (2002). Telomerase and differentiation in  
814 multicellular organisms: turn it off, turn it on, and turn it off again. *Differentiation*,  
815 *69*(4-5), 188-197. doi:10.1046/j.1432-0436.2002.690412.x
- 816 Gerhardt, T., & Ley, K. (2015). Monocyte trafficking across the vessel wall. *Cardiovascular*  
817 *Research*, *107*(3), 321-330. doi:10.1093/cvr/cvv147
- 818 Ghosh, A., Saginc, G., Leow, S. C., Khattar, E., Shin, E. M., Yan, T. D., . . . Tergaonkar, V.  
819 (2012). Telomerase directly regulates NF-kappaB-dependent transcription. *Nat Cell*  
820 *Biol*, *14*(12), 1270-1281. doi:10.1038/ncb2621
- 821 Gladyshev, V. N. (2021). The Ground Zero of Organismal Life and Aging. *Trends Mol Med*,  
822 *27*(1), 11-19. doi:10.1016/j.molmed.2020.08.012
- 823 Gomes, N. M. V., Ryder, O. a., Houck, M. L., Charter, S. J., Walker, W., Forsyth, N. R., . . .  
824 Wright, W. E. (2011). Comparative biology of mammalian telomeres: hypotheses on  
825 ancestral states and the roles of telomeres in longevity determination. *Aging Cell*,  
826 *10*, 761-768. doi:10.1111/j.1474-9726.2011.00718.x
- 827 Goodman, W. A., & Jain, M. K. (2011). Length does not matter: A new take on telomerase  
828 reverse transcriptase. *Arteriosclerosis, thrombosis, and vascular biology*, *31*, 235-  
829 236. doi:10.1161/ATVBAHA.110.220343
- 830 Greider, C. W., & Blackburn, E. H. (1985). Identification of a specific telomere terminal  
831 transferase activity in Tetrahymena extracts. *Cell*, *43*(2 Pt 1), 405-413.  
832 doi:10.1016/0092-8674(85)90170-9
- 833 Haendeler, J., Drose, S., Buchner, N., Jakob, S., Altschmied, J., Goy, C., . . . Dimmeler, S.  
834 (2009). Mitochondrial telomerase reverse transcriptase binds to and protects

- 835 mitochondrial DNA and function from damage. *Arterioscler Thromb Vasc Biol*, 29(6),  
836 929-935. doi:10.1161/ATVBAHA.109.185546
- 837 Hagey, D. W., Topcic, D., Kee, N., Reynaud, F., Bergsland, M., Perlmann, T., & Muhr, J.  
838 (2020). CYCLIN-B1/2 and -D1 act in opposition to coordinate cortical progenitor self-  
839 renewal and lineage commitment. *Nat Commun*, 11(1), 2898. doi:10.1038/s41467-  
840 020-16597-8
- 841 Hayflick, L. (2007). Biological aging is no longer an unsolved problem. *Ann N Y Acad Sci*,  
842 1100, 1-13. doi:10.1196/annals.1395.001
- 843 Henriques, C. M., Carneiro, M. C., Tenente, I. M., Jacinto, A., & Ferreira, M. G. (2013).  
844 Telomerase is required for zebrafish lifespan. *PLoS Genet*, 9(1), e1003214.  
845 doi:10.1371/journal.pgen.1003214
- 846 Henriques, C. M., & Ferreira, M. G. (2012). Consequences of telomere shortening during  
847 lifespan. *Curr Opin Cell Biol*, 24(6), 804-808. doi:10.1016/j.ceb.2012.09.007
- 848 Hong, S. N., Joung, J. G., Bae, J. S., Lee, C. S., Koo, J. S., Park, S. J., . . . Kim, Y. H. (2017). RNA-  
849 seq Reveals Transcriptomic Differences in Inflamed and Noninflamed Intestinal  
850 Mucosa of Crohn's Disease Patients Compared with Normal Mucosa of Healthy  
851 Controls. *Inflamm Bowel Dis*, 23(7), 1098-1108.  
852 doi:10.1097/MIB.0000000000001066
- 853 Ifergan, I., Kébir, H., Bernard, M., Wosik, K., Dodelet-Devillers, A., Cayrol, R., . . . Prat, A.  
854 (2007). The blood–brain barrier induces differentiation of migrating monocytes into  
855 Th17-polarizing dendritic cells. *Brain*, 131(3), 785-799. doi:10.1093/brain/awm295
- 856 Jaskelioff, M., Muller, F. L., Paik, J.-H., Thomas, E., Jiang, S., Adams, A. C., . . . Depinho, R. a.  
857 (2011). Telomerase reactivation reverses tissue degeneration in aged telomerase-  
858 deficient mice. *Nature*, 469, 102-106. doi:10.1038/nature09603
- 859 Jurk, D., Wang, C., Miwa, S., Maddick, M., Korolchuk, V., Tsolou, A., . . . von Zglinicki, T.  
860 (2012). Postmitotic neurons develop a p21-dependent senescence-like phenotype  
861 driven by a DNA damage response. *Aging Cell*, 11(6), 996-1004. doi:10.1111/j.1474-  
862 9726.2012.00870.x
- 863 Lange, C., Rost, F., Machate, A., Reinhardt, S., Lesche, M., Weber, A., . . . Brand, M. (2020).  
864 Single cell sequencing of radial glia progeny reveals the diversity of newborn neurons  
865 in the adult zebrafish brain. *Development*, 147(1). doi:10.1242/dev.185595
- 866 Lawson, N. D., Li, R., Shin, M., Grosse, A., Yukselen, O., Stone, O. A., . . . Zhu, L. (2020). An  
867 improved zebrafish transcriptome annotation for sensitive and comprehensive  
868 detection of cell type-specific genes. *Elife*, 9. doi:10.7554/eLife.55792
- 869 Lee, H. W., Blasco, M. A., Gottlieb, G. J., Horner, J. W., 2nd, Greider, C. W., & DePinho, R. A.  
870 (1998). Essential role of mouse telomerase in highly proliferative organs. *Nature*,  
871 392(6676), 569-574. doi:10.1038/33345
- 872 Lee, J., Jo, Y. S., Sung, Y. H., Hwang, I. K., Kim, H., Kim, S. Y., . . . Lee, H. W. (2010).  
873 Telomerase deficiency affects normal brain functions in mice. *Neurochem Res*, 35(2),  
874 211-218. doi:10.1007/s11064-009-0044-3
- 875 Lemoine, M. (2021). The Evolution of the Hallmarks of Aging. *Front Genet*, 12, 693071.  
876 doi:10.3389/fgene.2021.693071
- 877 Lentini, L., Barra, V., Schillaci, T., & Di Leonardo, A. (2012). MAD2 depletion triggers  
878 premature cellular senescence in human primary fibroblasts by activating a p53  
879 pathway preventing aneuploid cells propagation. *J Cell Physiol*, 227(9), 3324-3332.  
880 doi:10.1002/jcp.24030

- 881 Li, L., Song, J., Chuquisana, O., Hannocks, M. J., Loismann, S., Vogl, T., . . . Sorokin, L. (2020).  
882 Endothelial Basement Membrane Laminins as an Environmental Cue in Monocyte  
883 Differentiation to Macrophages. *Front Immunol*, *11*, 584229.  
884 doi:10.3389/fimmu.2020.584229
- 885 The hallmarks of aging, 153 (2013).
- 886 Lu, Z., Ding, L., Lu, Q., & Chen, Y. H. (2013). Claudins in intestines: Distribution and functional  
887 significance in health and diseases. *Tissue Barriers*, *1*(3), e24978.  
888 doi:10.4161/tisb.24978
- 889 Mattiussi, M., Tilman, G., Lenglez, S., & Decottignies, A. (2012). Human telomerase  
890 represses ROS-dependent cellular responses to Tumor Necrosis Factor- $\alpha$  without  
891 affecting NF- $\kappa$ B activation. *Cellular signalling*, *24*, 708-717.  
892 doi:10.1016/j.cellsig.2011.11.004
- 893 Morris, M., Hepburn, P., & Wynford-Thomas, D. (2002). Sequential extension of proliferative  
894 lifespan in human fibroblasts induced by over-expression of CDK4 or 6 and loss of  
895 p53 function. *Oncogene*, *21*(27), 4277-4288. doi:10.1038/sj.onc.1205492
- 896 Neale, B. M., Fagerness, J., Reynolds, R., Sobrin, L., Parker, M., Raychaudhuri, S., . . . Seddon,  
897 J. M. (2010). Genome-wide association study of advanced age-related macular  
898 degeneration identifies a role of the hepatic lipase gene (LIPC). *Proc Natl Acad Sci U S*  
899 *A*, *107*(16), 7395-7400. doi:10.1073/pnas.0912019107
- 900 Nersisyan, L., Hopp, L., Loeffler-Wirth, H., Galle, J., Loeffler, M., Arakelyan, A., & Binder, H.  
901 (2019). Telomere Length Maintenance and Its Transcriptional Regulation in Lynch  
902 Syndrome and Sporadic Colorectal Carcinoma. *Front Oncol*, *9*, 1172.  
903 doi:10.3389/fonc.2019.01172
- 904 Oliveros, J. C. (2007-2015). Venny. An interactive tool for comparing lists with Venn's  
905 diagrams. Retrieved from <https://bioinfogp.cnb.csic.es/tools/venny/index.html>
- 906 Ovadya, Y., & Krizhanovsky, V. (2014). Senescent cells: SASPected drivers of age-related  
907 pathologies. *Biogerontology*, *15*, 627-642. doi:10.1007/s10522-014-9529-9
- 908 Pam S. Ellis, R. R. M., Emily J. Thompson, Asma Farhat, Stephen A. Renshaw, Catarina M.  
909 Henriques. (2022). *A subset of gut leukocytes have telomerase-dependent "hyper-*  
910 *long" telomeres and require telomerase for function in zebrafish*. Biorxiv.
- 911 Pekalski, M. L., Ferreira, R. C., Coulson, R. M., Cutler, A. J., Guo, H., Smyth, D. J., . . . Wicker,  
912 L. S. (2013). Postthymic expansion in human CD4 naive T cells defined by expression  
913 of functional high-affinity IL-2 receptors. *J Immunol*, *190*(6), 2554-2566.  
914 doi:10.4049/jimmunol.1202914
- 915 Poehlmann, A., Habold, C., Walluscheck, D., Reissig, K., Bajbouj, K., Ullrich, O., . . . Schneider-  
916 Stock, R. (2011). Cutting edge: Chk1 directs senescence and mitotic catastrophe in  
917 recovery from G(2) checkpoint arrest. *J Cell Mol Med*, *15*(7), 1528-1541.  
918 doi:10.1111/j.1582-4934.2010.01143.x
- 919 Pruitt, S. C., Bailey, K. J., & Freeland, A. (2007). Reduced Mcm2 expression results in severe  
920 stem/progenitor cell deficiency and cancer. *Stem Cells*, *25*(12), 3121-3132.  
921 doi:10.1634/stemcells.2007-0483
- 922 Rahman, R., Latonen, L., & Wiman, K. G. (2005). hTERT antagonizes p53-induced apoptosis  
923 independently of telomerase activity. *Oncogene*, *24*(8), 1320-1327.  
924 doi:10.1038/sj.onc.1208232
- 925 Raj, D. D. A., Moser, J., van der Pol, S. M. A., van Os, R. P., Holtman, I. R., Brouwer, N., . . .  
926 Boddeke, H. W. G. M. (2015). Enhanced microglial pro-inflammatory response to  
927 lipopolysaccharide correlates with brain infiltration and blood-brain barrier

- 928 dysregulation in a mouse model of telomere shortening. *Aging Cell*, 1003-1013.  
929 doi:10.1111/accel.12370
- 930 Rando, T. A., & Wyss-Coray, T. (2021). Asynchronous, contagious and digital aging. *Nat*  
931 *Aging*, 1(1), 29-35. doi:10.1038/s43587-020-00015-1
- 932 Rera, M., Azizi, M. J., & Walker, D. W. (2013). Organ-specific mediation of lifespan extension:  
933 more than a gut feeling? *Ageing Res Rev*, 12(1), 436-444.  
934 doi:10.1016/j.arr.2012.05.003
- 935 Rera, M., Clark, R. I., & Walker, D. W. (2012). Intestinal barrier dysfunction links metabolic  
936 and inflammatory markers of aging to death in *Drosophila*. *Proc Natl Acad Sci U S A*,  
937 109(52), 21528-21533. doi:10.1073/pnas.1215849110
- 938 Ripa, R., Dolfi, L., Terrigno, M., Pandolfini, L., Savino, A., Arcucci, V., . . . Cellerino, A. (2017).  
939 MicroRNA miR-29 controls a compensatory response to limit neuronal iron  
940 accumulation during adult life and aging. *BMC Biol*, 15(1), 9. doi:10.1186/s12915-  
941 017-0354-x
- 942 Robin, J. D., Ludlow, A. T., Batten, K., Magdinier, F., Stadler, G., Wagner, K. R., . . . Wright, W.  
943 E. (2014). Telomere position effect: regulation of gene expression with progressive  
944 telomere shortening over long distances. *Genes Dev*, 28(22), 2464-2476.  
945 doi:10.1101/gad.251041.114
- 946 Romaniuk, A., Paszel-Jaworska, A., Toton, E., Lisiak, N., Holysz, H., Krolak, A., . . . Rubis, B.  
947 (2018). The non-canonical functions of telomerase: to turn off or not to turn off. *Mol*  
948 *Biol Rep*. doi:10.1007/s11033-018-4496-x
- 949 Rudnicka, E., Napierala, P., Podfigurna, A., Meczekalski, B., Smolarczyk, R., & Grymowicz, M.  
950 (2020). The World Health Organization (WHO) approach to healthy ageing.  
951 *Maturitas*, 139, 6-11. doi:10.1016/j.maturitas.2020.05.018
- 952 Santamarina-Fojo, S., Gonzalez-Navarro, H., Freeman, L., Wagner, E., & Nong, Z. (2004).  
953 Hepatic lipase, lipoprotein metabolism, and atherogenesis. *Arterioscler Thromb Vasc*  
954 *Biol*, 24(10), 1750-1754. doi:10.1161/01.ATV.0000140818.00570.2d
- 955 Sarin, K. Y., Cheung, P., Gilison, D., Lee, E., Tennen, R. I., Wang, E., . . . Artandi, S. E. (2005).  
956 Conditional telomerase induction causes proliferation of hair follicle stem cells.  
957 *Nature*, 436(7053), 1048-1052. doi:10.1038/nature03836
- 958 Schaum, N., Lehallier, B., Hahn, O., Palovics, R., Hosseinzadeh, S., Lee, S. E., . . . Wyss-Coray,  
959 T. (2020). Ageing hallmarks exhibit organ-specific temporal signatures. *Nature*,  
960 583(7817), 596-602. doi:10.1038/s41586-020-2499-y
- 961 Scheinin, T., Bohling, T., Halme, L., Kontiainen, S., Bjorge, L., & Meri, S. (1999). Decreased  
962 expression of protectin (CD59) in gut epithelium in ulcerative colitis and Crohn's  
963 disease. *Hum Pathol*, 30(12), 1427-1430. doi:10.1016/s0046-8177(99)90163-6
- 964 Schenkel, A. R., Mamdouh, Z., Chen, X., Liebman, R. M., & Muller, W. A. (2002). CD99 plays a  
965 major role in the migration of monocytes through endothelial junctions. *Nature*  
966 *immunology*, 3(2), 143-150. doi:10.1038/ni749
- 967 Schmidt, S., Schneider, L., Essmann, F., Cirstea, I. C., Kuck, F., Kletke, A., . . . Piekorz, R. P.  
968 (2010). The centrosomal protein TACC3 controls paclitaxel sensitivity by modulating  
969 a premature senescence program. *Oncogene*, 29(46), 6184-6192.  
970 doi:10.1038/onc.2010.354
- 971 Segal-Bendirdjian, E., & Geli, V. (2019). Non-canonical Roles of Telomerase: Unraveling the  
972 Imbroglio. *Front Cell Dev Biol*, 7, 332. doi:10.3389/fcell.2019.00332
- 973 Shokhirev, M. N., & Johnson, A. A. (2021). Modeling the human aging transcriptome across  
974 tissues, health status, and sex. *Aging Cell*, 20(1), e13280. doi:10.1111/accel.13280

- 975 Smith, L. K., He, Y., Park, J. S., Bieri, G., Snethlage, C. E., Lin, K., . . . Villeda, S. A. (2015).  
976 beta2-microglobulin is a systemic pro-aging factor that impairs cognitive function  
977 and neurogenesis. *Nat Med*, *21*(8), 932-937. doi:10.1038/nm.3898
- 978 Spilsbury, A., Miwa, S., Attems, J., & Saretzki, G. (2015). The role of telomerase protein TERT  
979 in Alzheimer's disease and in tau-related pathology in vitro. *J Neurosci*, *35*(4), 1659-  
980 1674. doi:10.1523/JNEUROSCI.2925-14.2015
- 981 Sullivan, D. I., Jiang, M., Hinchie, A. M., Roth, M. G., Bahudhanapati, H., Nouraie, M., . . .  
982 Alder, J. K. (2021). Transcriptional and Proteomic Characterization of Telomere-  
983 Induced Senescence in a Human Alveolar Epithelial Cell Line. *Front Med (Lausanne)*,  
984 *8*, 600626. doi:10.3389/fmed.2021.600626
- 985 Sung, Y. H., Ali, M., & Lee, H. W. (2014). Extracting extra-telomeric phenotypes from  
986 telomerase mouse models. *Yonsei Medical Journal*, *55*, 1-8.  
987 doi:10.3349/ymj.2014.55.1.1
- 988 Szklarczyk, D., Gable, A. L., Nastou, K. C., Lyon, D., Kirsch, R., Pyysalo, S., . . . von Mering, C.  
989 (2021). The STRING database in 2021: customizable protein-protein networks, and  
990 functional characterization of user-uploaded gene/measurement sets. *Nucleic Acids*  
991 *Res*, *49*(D1), D605-D612. doi:10.1093/nar/gkaa1074
- 992 Tabula Muris, C. (2020). A single-cell transcriptomic atlas characterizes ageing tissues in the  
993 mouse. *Nature*, *583*(7817), 590-595. doi:10.1038/s41586-020-2496-1
- 994 Tacutu, R., Thornton, D., Johnson, E., Budovsky, A., Barardo, D., Craig, T., . . . de Magalhaes,  
995 J. P. (2018). Human Ageing Genomic Resources: new and updated databases. *Nucleic*  
996 *Acids Res*, *46*(D1), D1083-D1090. doi:10.1093/nar/gkx1042
- 997 Tricoire, H., & Rera, M. (2015). A New, Discontinuous 2 Phases of Aging Model: Lessons from  
998 *Drosophila melanogaster*. *PLoS One*, *10*(11), e0141920.  
999 doi:10.1371/journal.pone.0141920
- 1000 Ugalde, A. P., Ramsay, A. J., de la Rosa, J., Varela, I., Marino, G., Cadinanos, J., . . . Lopez-  
1001 Otin, C. (2011). Aging and chronic DNA damage response activate a regulatory  
1002 pathway involving miR-29 and p53. *EMBO J*, *30*(11), 2219-2232.  
1003 doi:10.1038/emboj.2011.124
- 1004 Watt, P. M., & Hickson, I. D. (1994). Structure and function of type II DNA topoisomerases.  
1005 *Biochem J*, *303* ( Pt 3), 681-695. doi:10.1042/bj3030681
- 1006 Wienholds, E., van Eeden, F., Kusters, M., Mudde, J., Plasterk, R. H., & Cuppen, E. (2003).  
1007 Efficient target-selected mutagenesis in zebrafish. *Genome Res*, *13*(12), 2700-2707.  
1008 doi:10.1101/gr.1725103
- 1009 Zhang, H., Weyand, C. M., & Goronzy, J. J. (2021). Hallmarks of the aging T-cell system. *FEBS*  
1010 *J*, *288*(24), 7123-7142. doi:10.1111/febs.15770
- 1011 Zhang, M. J., Pisco, A. O., Darmanis, S., & Zou, J. (2021). Mouse aging cell atlas analysis  
1012 reveals global and cell type-specific aging signatures. *Elife*, *10*.  
1013 doi:10.7554/eLife.62293
- 1014 Zhao, Y., Hasse, S., & Bourgoin, S. G. (2021). Phosphatidylserine-specific phospholipase A1: A  
1015 friend or the devil in disguise. *Prog Lipid Res*, *83*, 101112.  
1016 doi:10.1016/j.plipres.2021.101112
- 1017 Zhu, S., Paydar, M., Wang, F., Li, Y., Wang, L., Barrette, B., . . . Peng, A. (2020). Kinesin Kif2C  
1018 in regulation of DNA double strand break dynamics and repair. *Elife*, *9*.  
1019 doi:10.7554/eLife.53402
- 1020

1021

## 1022 **FIGURE LEGENDS**

1023

1024 **Graphical Abstract:** Telomerase depletion accelerates the appearance of hallmark of ageing  
1025 in both gut and brain. In specific, the *tert*<sup>-/-</sup> gut at 2 months shows similar hallmarks of  
1026 ageing as the WT old gut, whereas the brain *tert*<sup>-/-</sup> brain only *starts* displaying similar  
1027 hallmarks of ageing as the WT old brain from the age of 9 months. We identified stem cell  
1028 exhaustion is the common principal hallmark of ageing at the early stages of ageing, in both  
1029 tissues. Finally, we further identified altered intercellular communication as the main  
1030 telomerase-dependent hallmark of ageing common between the gut and brain.

1031

1032 **Fig 1. Summary of the experimental design and principal component analysis (PCA).** (A)  
1033 RNA-Sequencing was performed in whole gut and brain tissues from WT and *tert*<sup>-/-</sup>  
1034 zebrafish, at different timepoints throughout their lifespan. Age-associated transcriptomic  
1035 changes were analysed using two different methods: time-series analysis (genes that change  
1036 consistently overtime) and all differentially expressed genes (ALL DEGs; genes whose  
1037 expression is altered over-time, in both genotypes, as compared with the WT young  
1038 baseline. (B) PCA representing the variation in the data from gut (gold) and brain (pink)  
1039 tissues, in both WT and *tert*<sup>-/-</sup> fish. (C-D) PCA showing the variation in the data from fish at  
1040 different ages (2 months, pink; 9 months, green; 22 months, blue; 35 months, purple), in WT  
1041 (circle) versus *tert*<sup>-/-</sup> fish (triangle), in (C) gut and (D) brain samples. PCA was performed  
1042 using the plotPCA function of DESeq2 and considering the top 500 genes with highest  
1043 variance across the samples. (E) Summary of the number of significantly de-regulated genes  
1044 at each time-point, in both genotypes, in gut (E1) and brain (E2) tissues, over-time, as  
1045 compared with the WT young baseline.

1046

1047 **Fig 2. Identification of time-dependent signatures of ageing in the WT and *tert*<sup>-/-</sup> zebrafish**  
1048 **gut and brain.** (A, B) Transcriptomic temporal profiles in the (A) gut and brain (B) of WT  
1049 (black) and *tert*<sup>-/-</sup> fish (red) were identified using the Short Time-series Expression Miner  
1050 (STEM) and are represented in line plots. The thicker lines on the plots represent the  
1051 median fold change of each profile. For each temporal profile, enrichment analysis was

1052 performed using the enrichGO, enrichKEGG, and enrichPathway functions of clusterProfiler  
1053 package version 3.18.0. Processes and pathways from each temporal profile were further  
1054 classified and grouped according to the main hallmarks of ageing (Lemoine, 2021; López-  
1055 Otín et al., 2013), which is represented in pie charts. (A1, B1) A summary of the enrichment  
1056 analysis of one of the profiles is represented in the bar plots, where processes and pathways  
1057 are represented in different colours according to the classification into hallmarks of ageing.  
1058 This summary contains the top enriched processes and pathways from each database (p-  
1059 value >0.05 and at least 3 core enrichment genes; up to 5 terms *per* database: GOBP, GOCC,  
1060 GOMF, KEEG, and REACTOME).

1061

1062 **Fig 3. Qualitative changes in the hallmarks of ageing over-time, comparing WT and *tert*<sup>-/-</sup>**  
1063 **zebrafish gut and brain.** The age-associated enriched processes and pathways identified in  
1064 the previous figures were further re-classified and grouped into the main well-known  
1065 hallmarks of ageing. (A-B) Pie charts represent the hallmarks of ageing identified in the (A)  
1066 gut and (B) brain, at different ages throughout WT (black) and *tert*<sup>-/-</sup> (red) zebrafish lifespan.  
1067 This analysis was performed considering the (A1, B1) genes identified in the temporal  
1068 profiles (within STEM), (A2, B2) all the genes differentially expressed at any timepoint  
1069 (within ALL DEGs), and (A3, B3) STEM and ALL DEGs combined. (A4, B4) The number of  
1070 transcriptomic changes increases with ageing in both (A4) gut and (B4) brain, independently  
1071 of the phenotype, when considering either the genes within STEM or the genes within ALL  
1072 DEGs.

1073

1074 **Fig 4. Determining at which age *tert*<sup>-/-</sup> share more genes associated with the hallmarks of**  
1075 **ageing, with the naturally aged WT.** (A) Venn diagrams highlight the number of genes  
1076 associated with hallmarks of ageing in common between old WT (35 months) and *tert*<sup>-/-</sup> at  
1077 the different ages tested, in (A.1) gut and (A.2) brain tissues. Data show that the *tert*<sup>-/-</sup> gut at  
1078 2 months has the most number genes associated with hallmarks of ageing in common with  
1079 old WT gut. The *tert*<sup>-/-</sup> brain at 22 months has the most number genes associated with  
1080 hallmarks of ageing in common with old WT brain. The respective lists of genes shared  
1081 between old WT gut and *tert*<sup>-/-</sup> gut at 2 months and old WT brain and *tert*<sup>-/-</sup> 22-month brain  
1082 is shown in B (B.1 gut, B.2, brain). (B1.1, B1.2) Gene networks with the genes identified in  
1083 B.1 and B.2 were performed (B1.1 and B1.2, respectively) by K-means clustering using String



1084 software. These include the genes identified in the temporal profiles (from STEM) and in  
1085 ALL DEGs.

1086

1087 **Fig 5. Identifying *tert*-dependent gene changes in zebrafish gut and brain ageing and their**  
1088 **chromosome location in relation to the telomeric end.** (A-B) Gene alterations that are  
1089 anticipated in the *tert*<sup>-/-</sup> when comparing with WT at the same age (i.e., telomerase-  
1090 dependent). (A1, B1) Protein-protein interaction network of these genes highlights clusters  
1091 of genes associated with (A1) metabolic processes in the gut and clusters of genes  
1092 associated with (B1) cell cycle, genome instability and immune system in the brain. (C) Genes  
1093 located at the end of the chromosome (i.e., <10MB from chromosome end) are likely to be  
1094 directly affected by telomere shortening due to the telomere positioning effect (TPE). The  
1095 data show that there is no significant difference between telomerase-dependent and -  
1096 independent genes, in what concerns their proximity to the chromosome end, in either gut  
1097 (C2) or brain (C3). However, there is a significantly higher number of telomerase-dependent  
1098 genes located at the end of chromosomes in the gut than in the brain (C4).

1099

1100 **Fig 6. Determining genes and pathways altered with ageing that are in common between**  
1101 **gut and brain.** (A) Graph represents WT zebrafish lifespan and highlights 'early' and 'late'  
1102 stages of ageing. (A.1) All genes identified in common between gut and brain at early (9  
1103 months) and late (35 months) stages of ageing. \*G and \*B represent telomerase-dependent  
1104 genes in the Gut or in the Brain, respectively. (B-C) Protein-protein interaction networks  
1105 with the genes found in common between the gut and brain at (B) early and (C) late stages  
1106 of ageing were performed using STRING software. These include the genes identified in the  
1107 temporal profiles (from STEM) and in ALL DEGs.

1108

#### 1109 SUPPLEMENTARY FIGURE LEGENDS

1110 **Supplementary Fig 1. Genes associated with the hallmarks of ageing that are in common**  
1111 **between 35-months-old WT and *tert*<sup>-/-</sup> at different ages, in the (A1) gut and (A2) brain.** The  
1112 different colours represent different hallmarks of ageing: purple, loss of proteostasis;  
1113 yellow, mitochondrial dysfunction; green, altered intercellular communication. These  
1114 include the genes identified in the temporal profiles (from STEM) and in ALL DEGs.

1115

1116 **Supplementary Fig 2. Protein-protein interaction network and cluster analysis of gene**  
1117 **changes in WT at the ‘origins’ versus ‘later’ stages of ageing.** (A) Genes identified in  
1118 common between gut and brain at 9 and 35 months of age. B) Genes significantly altered at  
1119 “early” and “late” stages of ageing in the gut (B1, 2) and brain (C1, 2), respectively. Network  
1120 analysis was performed in STRING software and included the genes identified in the  
1121 temporal profiles (from STEM) and in ALL DEGs. Red squares highlight the protein-protein  
1122 interaction network of the gene changes that are accelerated in the *tert*<sup>-/-</sup> (tert-dependent).

1123

1124

1125

1126

1127

1128

1129

1130

1131

1132

1133

1134

1135

1136

1137

1138

1139

1140

1141

1142

1143

1144

1145

1146

1147

1148

1149

1150

1151

# Graphical Abstract

## Kinetics of ageing in the zebrafish gut and brain

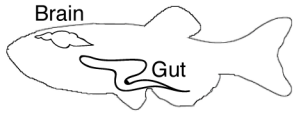

Main hallmarks of ageing affected

- Genomic instability
- Loss of proteostasis
- Deregulated nutrient sensing
- Stem cell exhaustion
- Altered intercellular communication

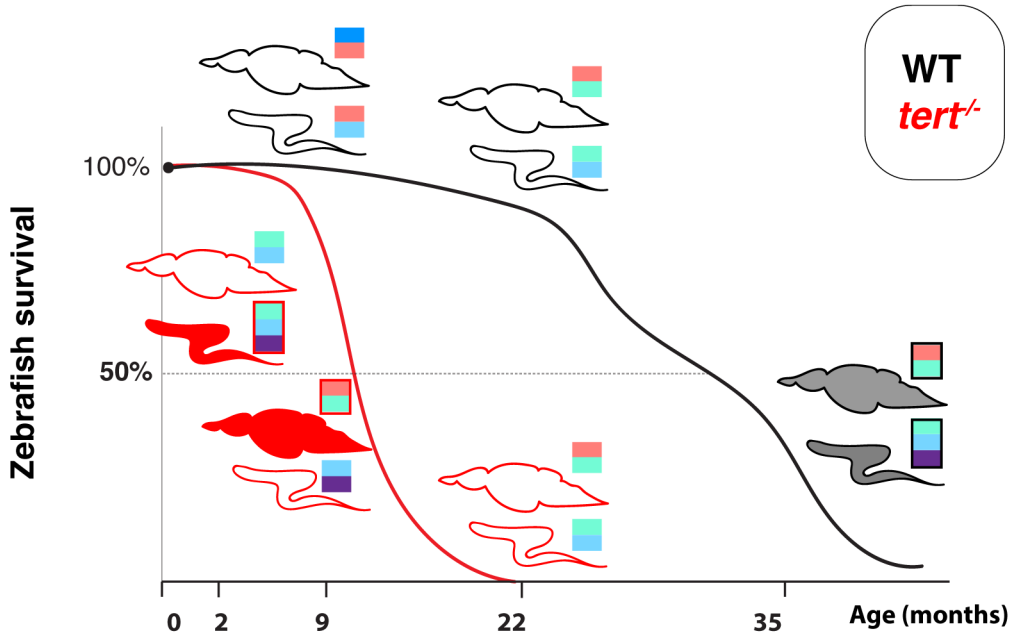

# FIGURE 1

## A) Study design

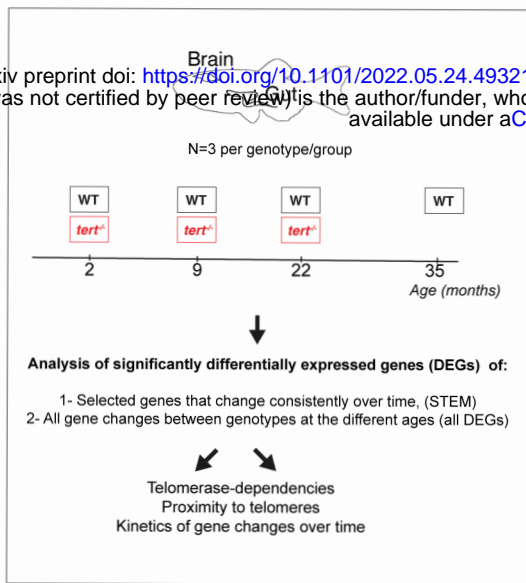

bioRxiv preprint doi: <https://doi.org/10.1101/2022.05.24.493215>; this version posted May 26, 2022. The copyright holder for this preprint (which was not certified by peer review) is the author/funder, who has granted bioRxiv a license to display the preprint in perpetuity. It is made available under aCC-BY-NC-ND 4.0 International license.

## B) Principal Component Analysis (PCA) of all samples

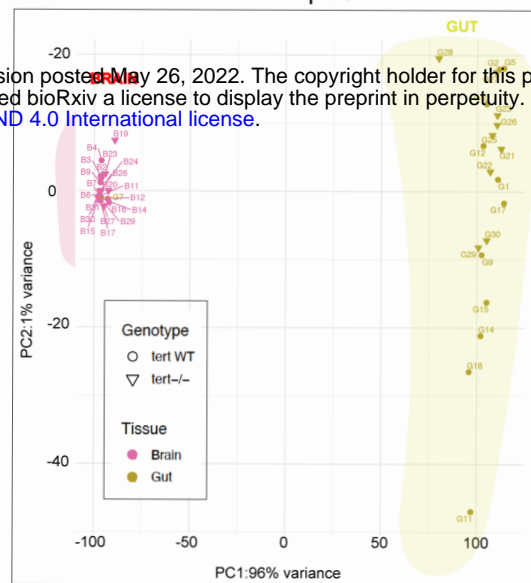

## C) Gut

### PCA of gut samples

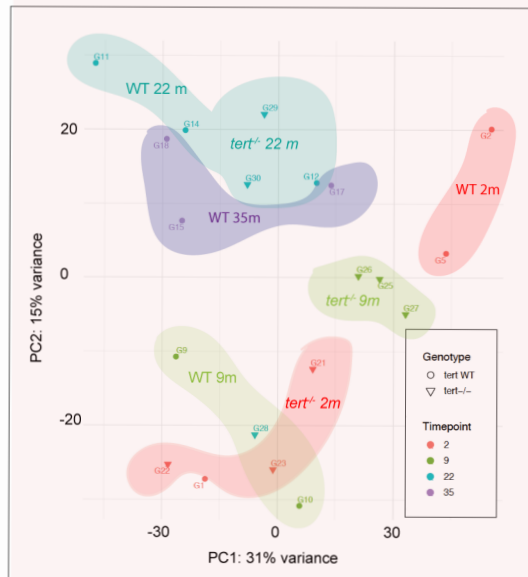

## D) Brain

### PCA of brain samples

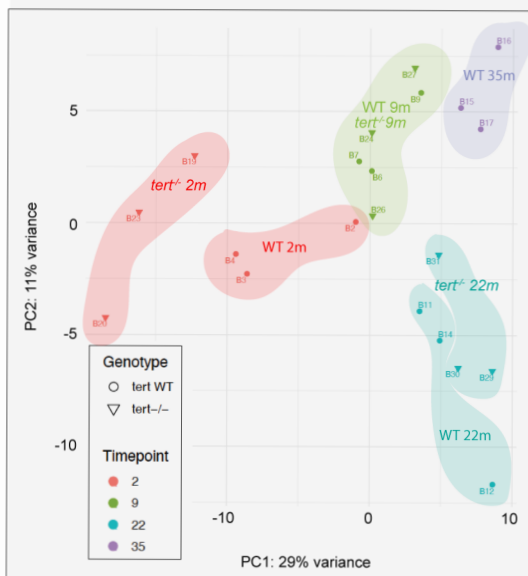

## E) Summary of significant Differentially Expressed Genes (DEGs) numbers

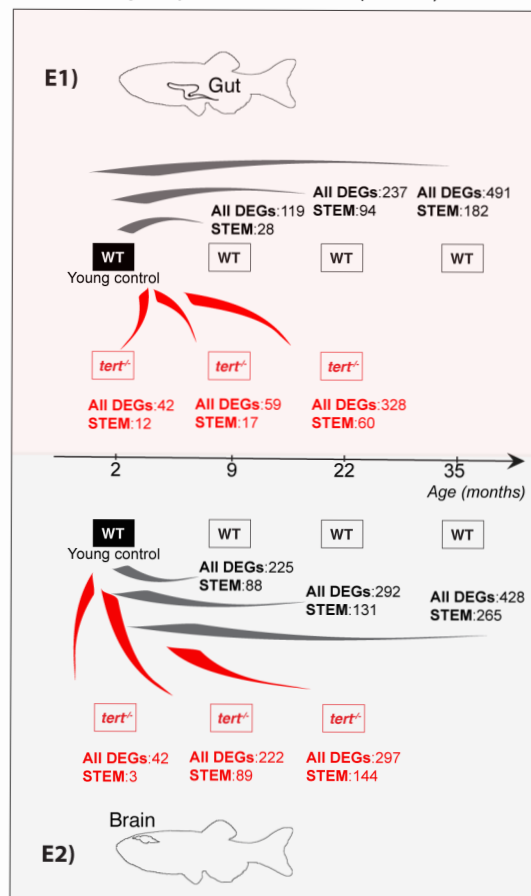

## Figure 2 Significant STEM profiles and main processes associated, categorised according to known hallmarks of ageing

bioRxiv preprint doi: <https://doi.org/10.1101/2022.05.24.493215>; this version posted May 26, 2022. The copyright holder for this preprint (which was not certified by peer review) is the author/funder, who has granted bioRxiv a license to display the preprint in perpetuity. It is made available under aCC-BY-NC-ND 4.0 International license.

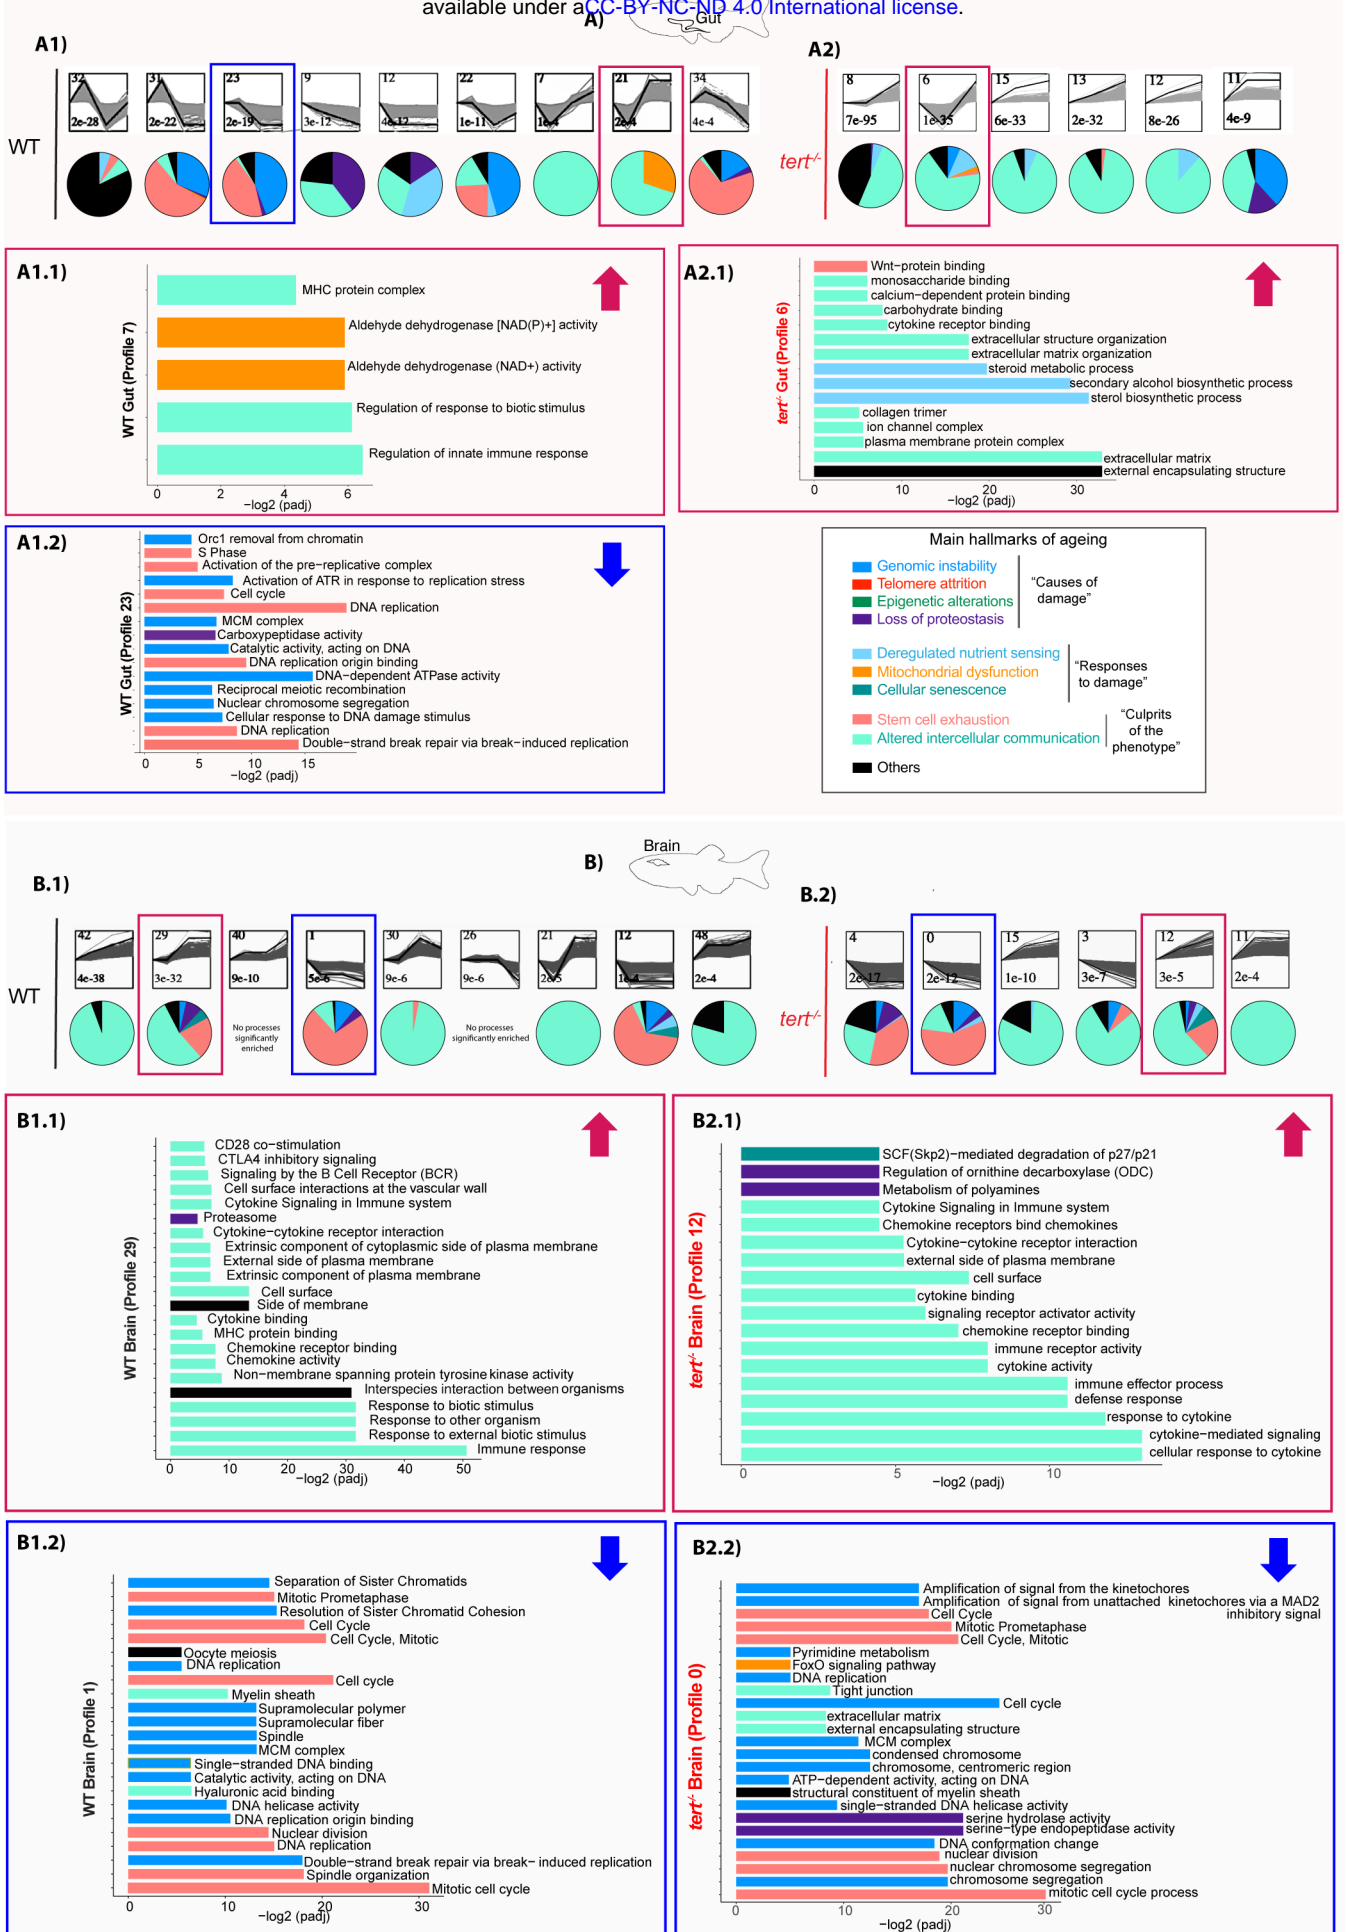

**Figure 3** Kinetics of ageing in the zebrafish gut and brain

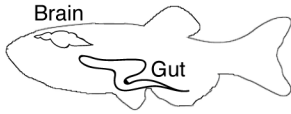

Main hallmarks of ageing affected

- Genomic instability
- Telomere attrition
- Epigenetic alterations
- Loss of proteostasis
- Deregulated nutrient sensing
- Mitochondrial dysfunction
- Cellular senescence
- Stem cell exhaustion
- Altered intercellular communication
- Others

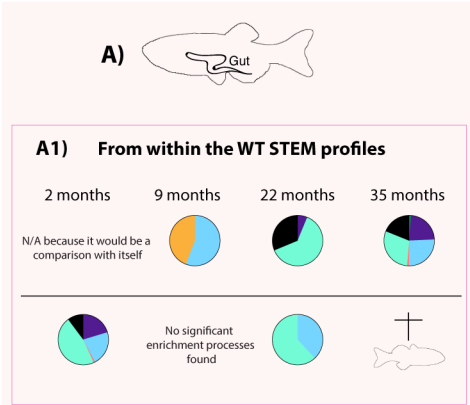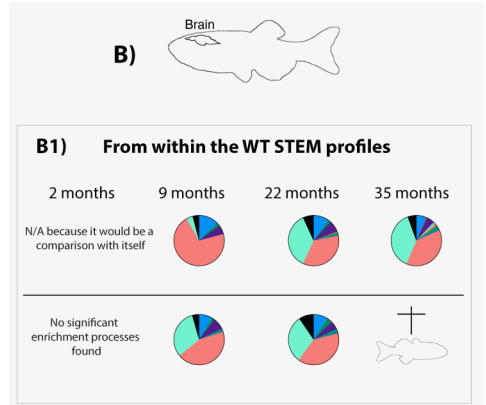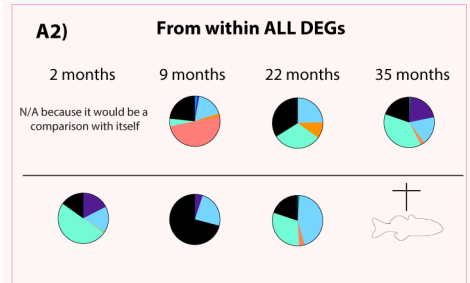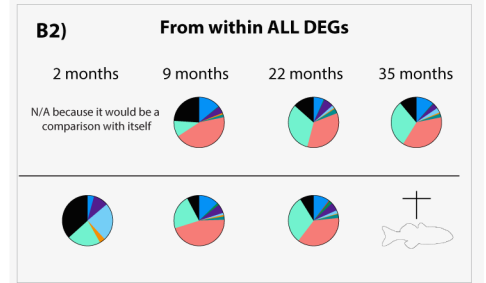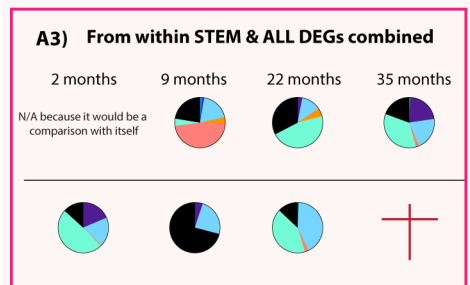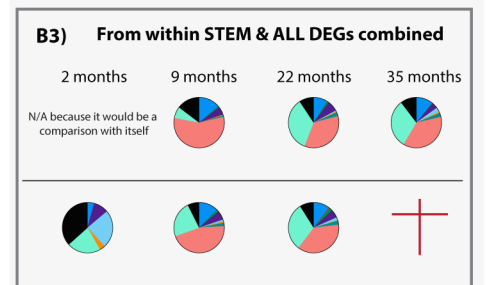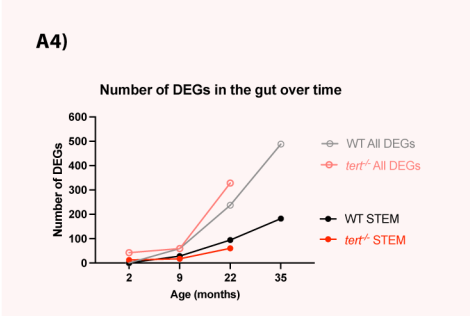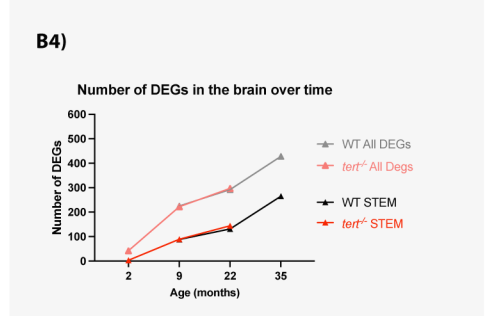

# Figure 4

## A) Genes associated with the hallmarks of ageing in common between *tert*<sup>-/-</sup> at the different ages and the aged WT at 35 months

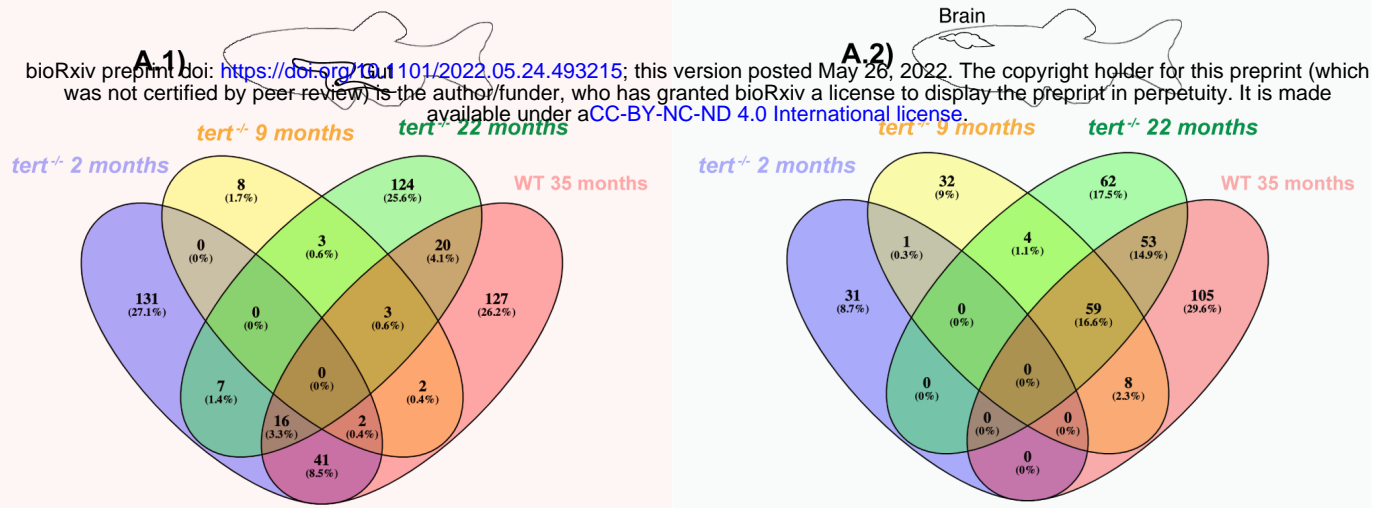

## B) Most gene changes shared between *tert*<sup>-/-</sup> and 35 month old WT, related to the main hallmarks of ageing affected

### B.1) GUT

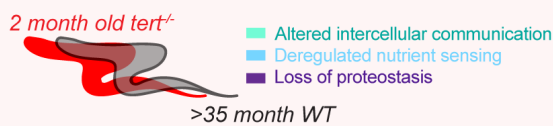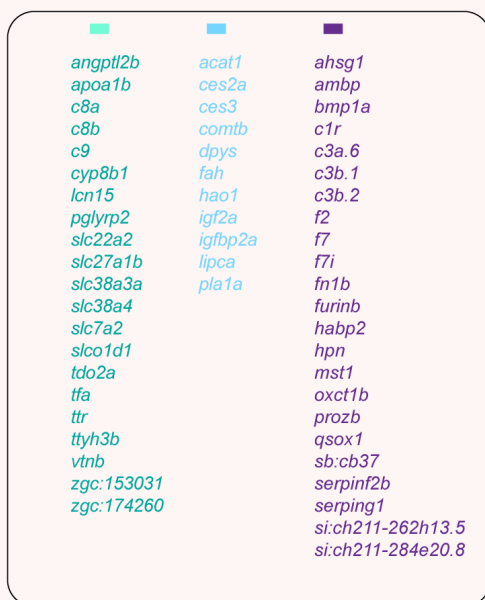

### B1.1) String Network analysis (K means clustering) GUT

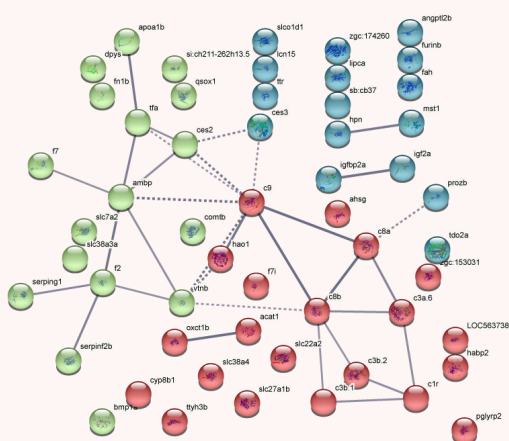

### B.2) BRAIN

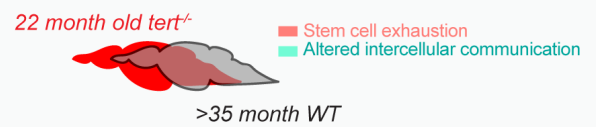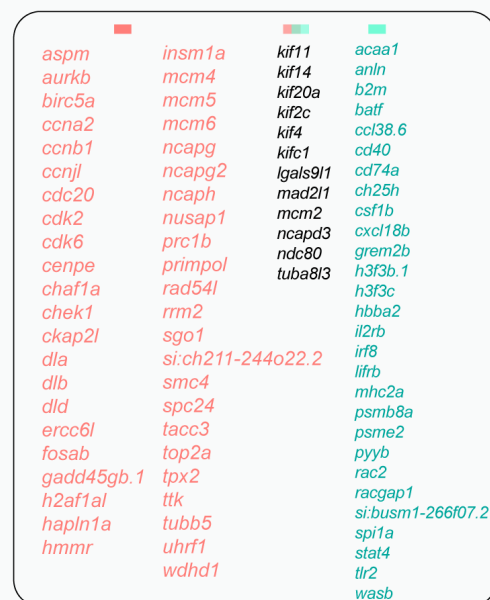

### B.2.1) String Network analysis (K means clustering) BRAIN

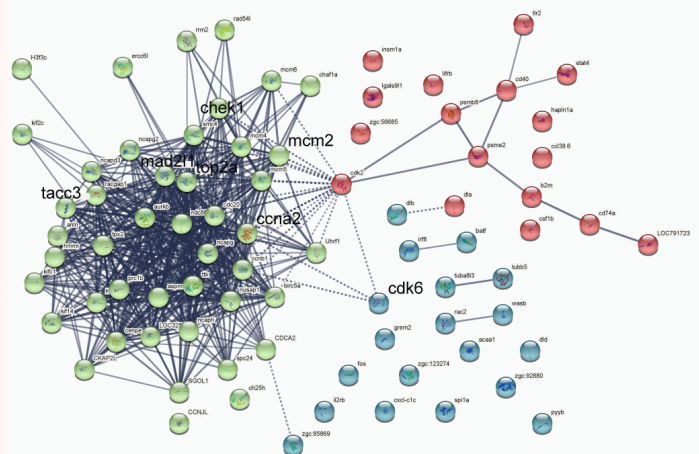



**Figure 5**

**tert-dependent gene changes of old age**

bioRxiv preprint doi: <https://doi.org/10.1101/2022.05.24.493215>; this version posted May 26, 2022. The copyright holder for this preprint (which was not certified by peer review) is the author/funder, who has granted bioRxiv a license to display the preprint in perpetuity. It is made available under aCC-BY-NC-ND 4.0 International license.

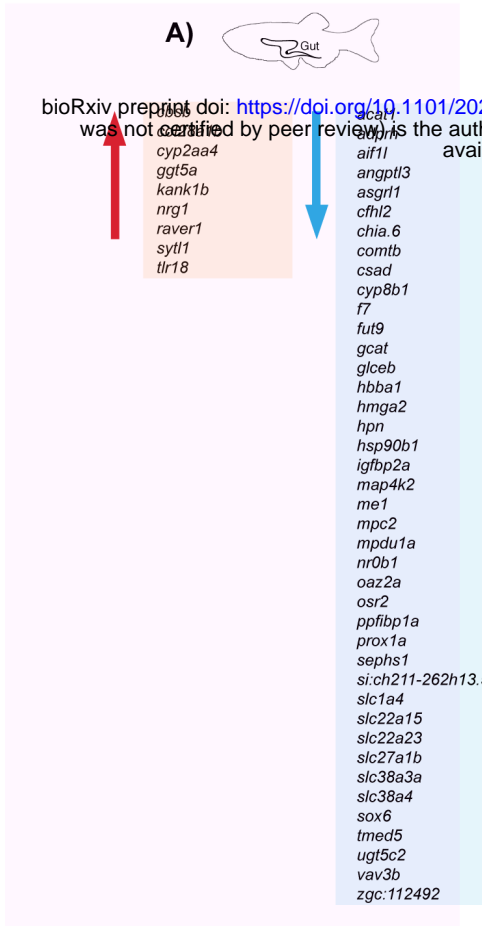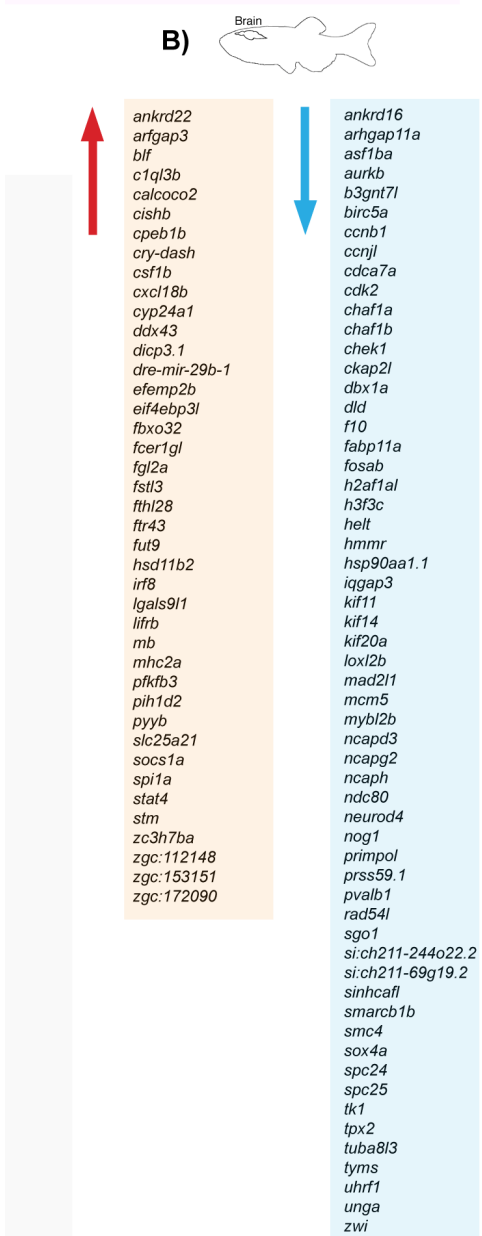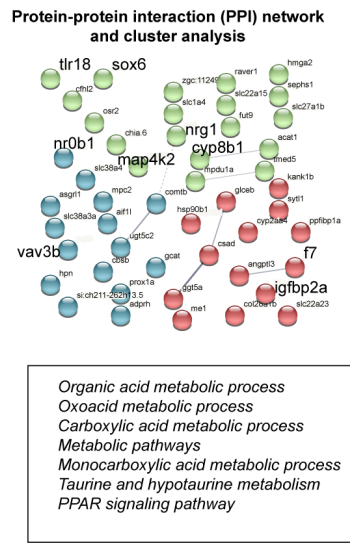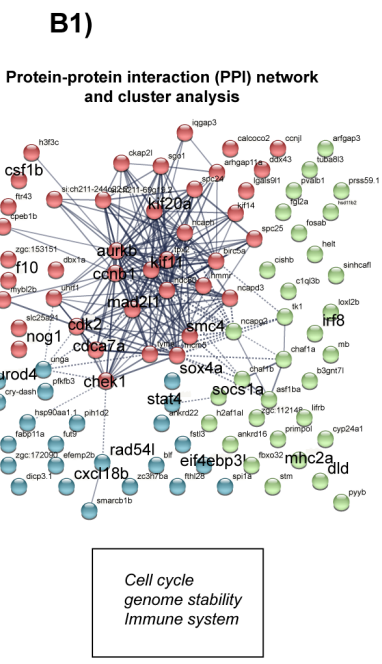

**C) Chromosome location of tert-dependent versus independent gene changes in the gut and brain**

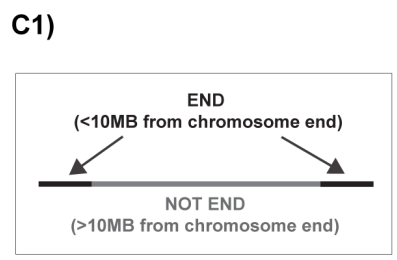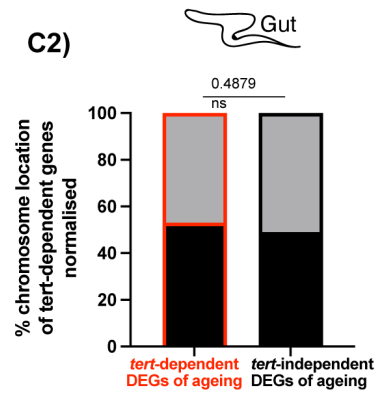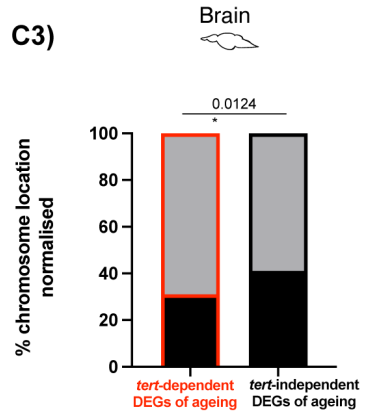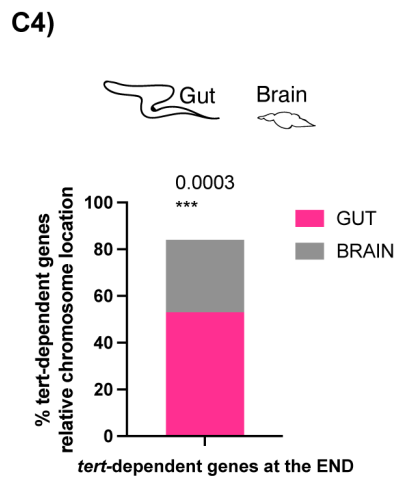

# FIGURE 6

## Protein-protein interaction (PPI) network and cluster analysis of changes in WT ageing (STEM and All DEGs combined)

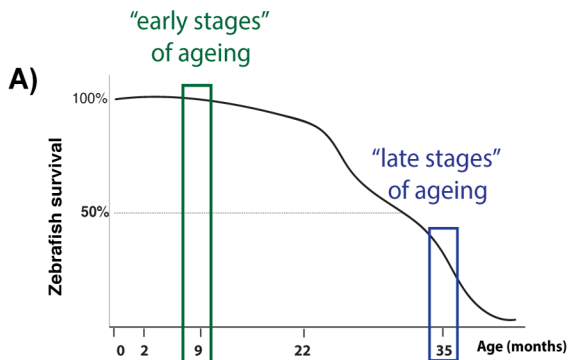

### A.1) DEGs shared between gut and brain

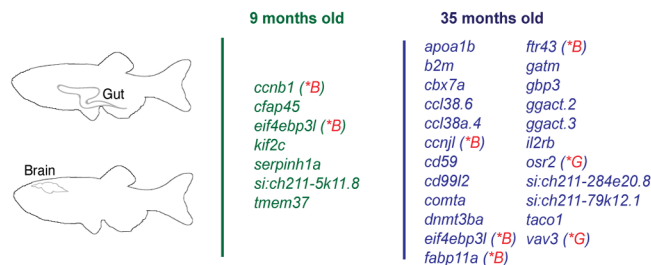

### B) PPI of DEGs shared between gut and brain at 9 months

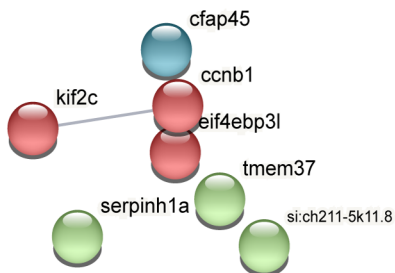

### C) PPI of DEGs shared between gut and brain at 35 months

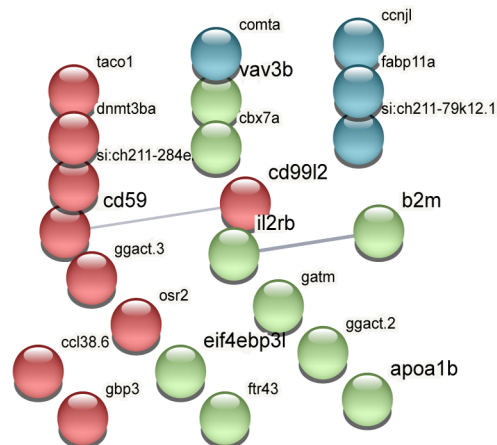

# Supp Fig 1

## A) Genes associated with the hallmarks of ageing in common between *tert*<sup>-/-</sup> at the different ages and the aged WT at 35 months

A1)

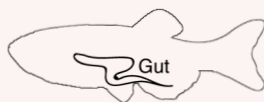

WT 35 months x

### *tert*<sup>-/-</sup> 2 months

*acat1* sb:cb37  
*ahsg1* serpinf2b  
*ambp* serping1  
*angptf2b* si:ch211-262h13.5  
*apoa1b* si:ch211-284e20.8  
*bmp1a* slc22a2  
*c1r* slc27a1b  
*c3a.6* slc38a3a  
*c3b.1* slc38a4  
*c3b.2* slc7a2  
*c8a* slco1d1  
*c8b* tdo2a  
*c9* tfa  
*ces2a* ttr  
*ces3* ttyh3b  
*comtb* vtnb  
*cyp8b1* zgc:153031  
*dpys* zgc:174260  
*f2*  
*f7*  
*f7i*  
*fah*  
*fn1b*  
*funinb*  
*habp2*  
*hao1*  
*hbba1*  
*hpn*  
*igl2a*  
*igfbp2a*  
*lcn15*  
*lipca*  
*mst1*  
*nr0b1*  
*oxct1b*  
*pglyrp2*  
*pla1a*  
*prox1a*  
*prozb*  
*qsox1*

### *tert*<sup>-/-</sup> 9 months

*acsf2*  
*cyp8b1*  
*hbaa2*  
*mgll*  
*p4ha2*  
*pla1a*  
*sephs1*

### *tert*<sup>-/-</sup> 22 months

*acat1*  
*angptf3*  
*comtb*  
*f10*  
*f7*  
*fam83d*  
*gatm*  
*gbp3*  
*gcat*  
*ggt5a*  
*glyclt*  
*gpt*  
*hpn*  
*itln2*  
*me1*  
*mlsl*  
*mpc1*  
*nr0b1*  
*nrg1*  
*oaz2a*  
*pcbd1*  
*pcxa*  
*pfklb*  
*prox1a*  
*si:ch211-262h13.5*  
*si:ch211-284e20.8*  
*slc16a6a*  
*slc1a4*  
*slc27a1b*  
*slc38a3a*  
*slc38a4*  
*slc43a1b*  
*slc7a2*  
*slco1d1*  
*ttr*  
*tyh3b*  
*urahb*  
*vkorc1*  
*zgc:92040*

A2)

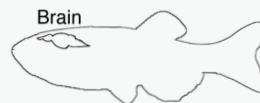

WT 35 months x

### *tert*<sup>-/-</sup> 9 months

*anln*  
*arhgap11a*  
*aspm*  
*aurkb*  
*ccna2*  
*ccnb1*  
*cd40*  
*cdc20*  
*cdk2*  
*cdk6*  
*cenpe*  
*chaf1b*  
*cyp24a1*  
*dbx1a*  
*dld*  
*dnmt3aa*  
*dnmt3ba*  
*ercc6l*  
*f10*  
*gadd45gb.1*  
*hapln1a*  
*hsp90aa1.1*  
*igf2bp1*  
*insm1a*  
*kif11*  
*kif14*  
*kif20a*  
*kif2c*  
*kif4*  
*lgals9l1*  
*lifr*  
*mad2l1*  
*marcksaa*  
*mbpb*  
*mcm2*  
*mcm5*

*mcm6*  
*mybl2b*  
*ncapd3*  
*ncapg*  
*ncapg2*  
*ncaph*  
*ndc80*  
*neurod4*  
*nusap1*  
*orc3*  
*plp1b*  
*primpol*  
*rrm2*  
*sgo1*  
*si:ch211-244o22.2*  
*cdc20*  
*cdk2*  
*cdk6*  
*socs1a*  
*sox4a*  
*sox4b*  
*spc24*  
*spc25*  
*spi1a*  
*tacc3*  
*top2a*  
*tpx2*  
*ttk*  
*tubb5*  
*tyms*  
*uhrf1*  
*unga*

### *tert*<sup>-/-</sup> 22 months

*acaa1*  
*anln*  
*asf1ba*  
*aspm*  
*aurkb*  
*b2m*  
*balf*  
*birc5a*  
*cc138.6*  
*ccna2*  
*ccnb1*  
*cenjl*  
*cd40*  
*cd74a*  
*cdc20*  
*cdk2*  
*cdk6*  
*cenpe*  
*ch25h*  
*chaf1a*  
*chaf1b*  
*chek1*  
*ckap2l*  
*csf1b*  
*cxcl18b*  
*dbx1a*  
*dla*  
*dlb*  
*dld*  
*dnmt3aa*  
*dnmt3ba*  
*ercc6l*  
*fosab*  
*foxn4*  
*gadd45gb.1*  
*grem2b*  
*h2af1al*  
*h3f3b.1*  
*h3f3c*  
*hapln1a*  
*hbaa2*  
*hbba2*  
*hmmr*  
*igf2bp1*  
*il2rb*  
*inab*  
*insm1a*  
*irf8*  
*kif11*  
*kif14*  
*kif20a*  
*kif2c*  
*kif4*  
*kifc1*  
*lgals9l1*  
*lifrb*  
*mad2l1*  
*marcksaa*  
*mbpb*  
*mcm2*  
*mcm4*  
*mcm5*  
*mcm6*  
*mhc2a*  
*mybl2b*  
*ncapd3*  
*ncapg*  
*ncapg2*  
*ncaph*  
*ndc80*  
*nefmb*  
*neurod4*  
*nusap1*  
*plp1a*  
*plp1b*  
*ppp1r14ba*  
*prc1b*  
*prdm8*  
*primpol*  
*psmb8a*  
*psme2*  
*pyyb*  
*rac2*  
*racgap1*  
*rad54l*  
*rrm2*  
*sgo1*  
*si:busm1-266f07.2*  
*si:ch211-244o22.2*  
*smarcb1b*  
*smc4*  
*sox11a*  
*sox4a*  
*sox4b*  
*spc24*  
*spi1a*  
*spinb*  
*stat4*  
*tacc3*  
*tap2a*  
*tlr2*  
*top2a*  
*tpx2*  
*ttk*  
*tuba8l3*  
*tubb5*  
*tyms*  
*ube2c*  
*uhrf1*  
*wash*  
*wldh1*  
*zwi*

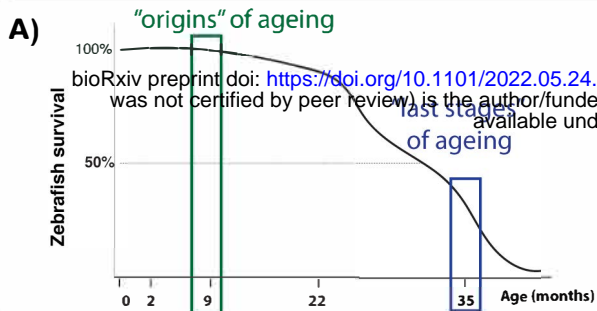

**A.1) DEGs shared between gut and brain**

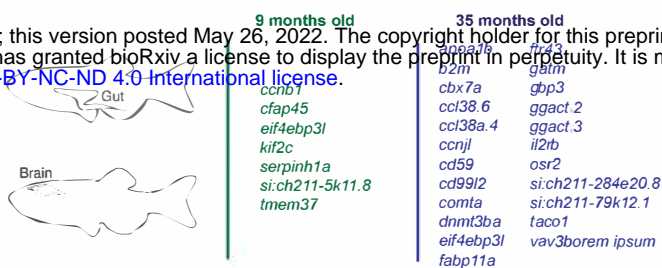

**B) GUT**

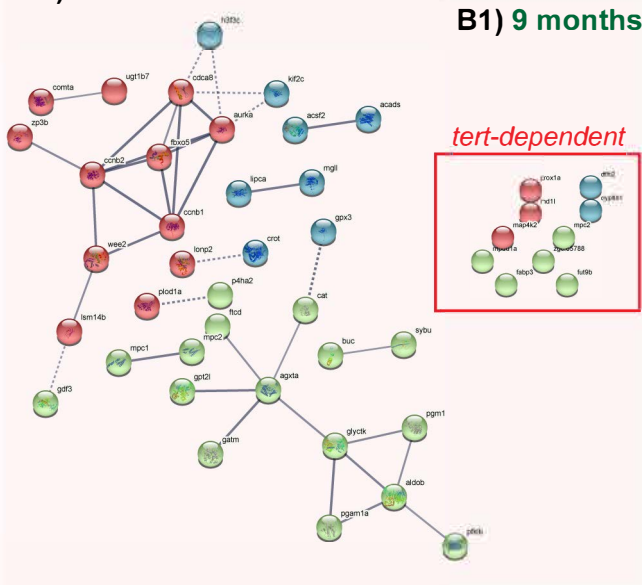

**B2) 35 months**

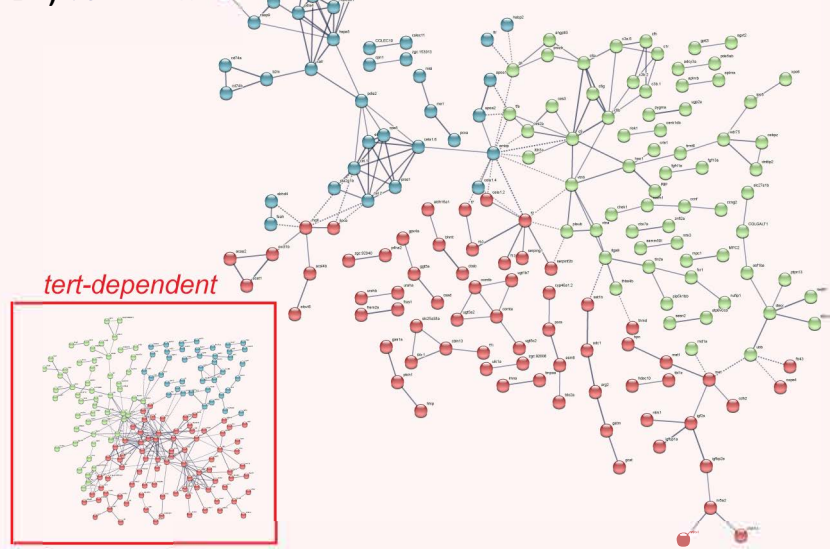

**C) BRAIN**

**C1) 9 months**

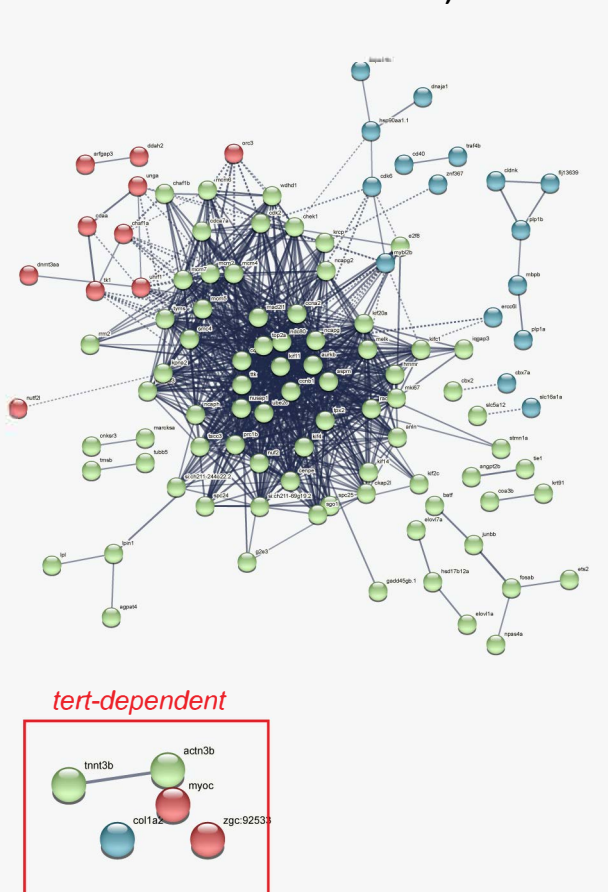

**C2) 35 months**

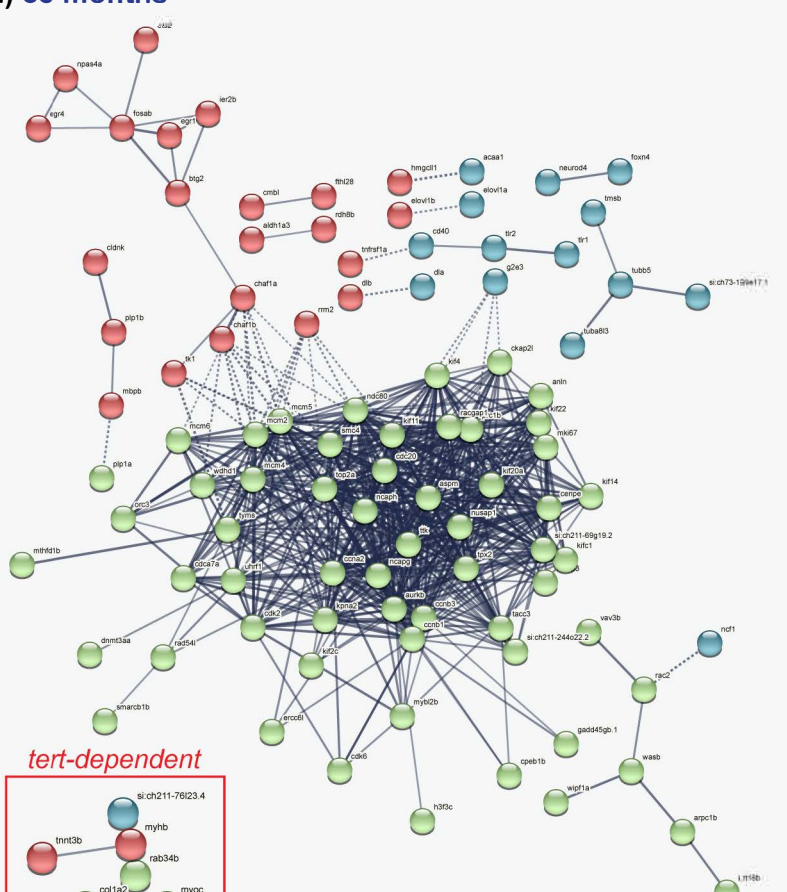

Source: https://www.biorxiv.org/content/biorxiv/early/2022/05/26/2022.05.24.493215.full.pdf
